# Supplementary material for: Novel circular RNA hsa_circ_0036683 suppresses proliferation and migration by mediating the miR‐4664‐3p/CDK2AP2 axis in non‐small cell lung cancer
Source: PubMed Central journal article supplement — Thorac Cancer. 2024 Aug 7;15(27):1929–45. doi: 10.1111/1759-7714.15396 (PMC11462936; doi:10.1111/1759-7714.15396), 2024-08-07

## Replication 1

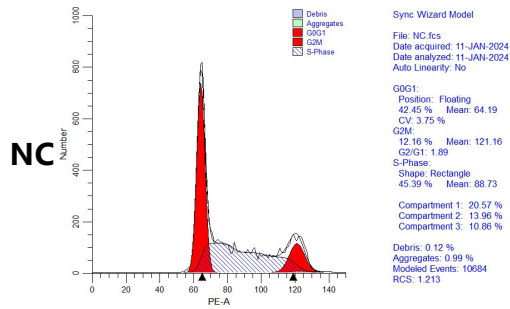

## Replication 2

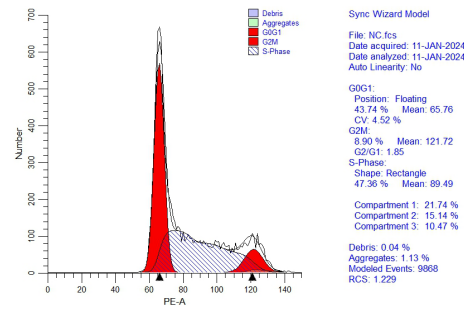

## Replication 3

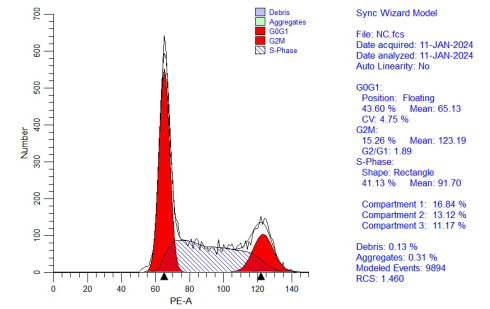

## miR-4664-3p

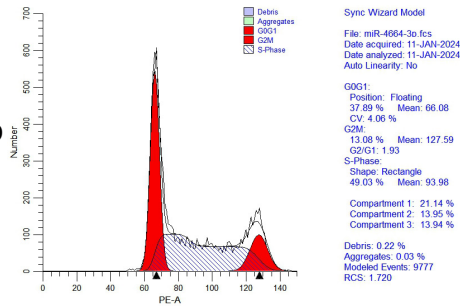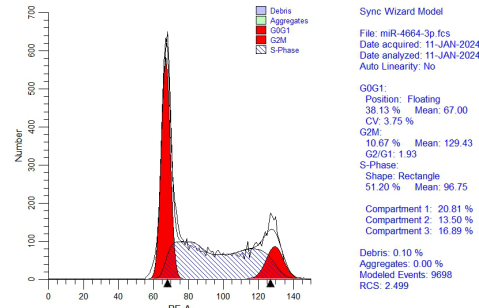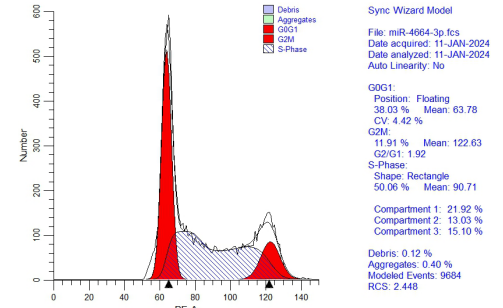

## Replication 1

Scram

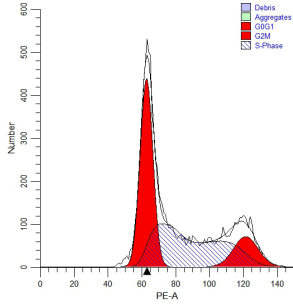

Sync Wizard Model  
File: scram.fcs  
Date acquired: 24-Jan-2024  
Date analyzed: 24-Jan-2024  
Auto Linearity: No  
G0G1:  
Position: Floating  
42.73 % Mean: 62.72  
CV: 5.99 %  
G2M:  
13.19 % Mean: 121.41  
G2/G1: 1.94  
S-Phase:  
Shape: Rectangle  
44.06 % Mean: 88.89  
Compartment 1: 20.46 %  
Compartment 2: 11.02 %  
Compartment 3: 12.60 %  
Debris: 0.24 %  
Aggregates: 0.00 %  
Modeled Events: 9746  
RCS: 1.777

## Replication 2

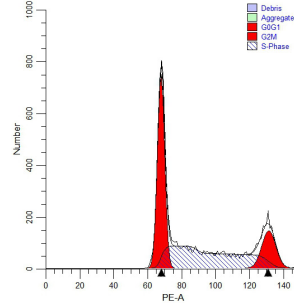

Sync Wizard Model  
File: scram.fcs  
Date acquired: 24-Jan-2024  
Date analyzed: 24-Jan-2024  
Auto Linearity: No  
G0G1:  
Position: Floating  
41.61 % Mean: 67.78  
CV: 3.11 %  
G2M:  
15.50 % Mean: 131.35  
G2/G1: 1.94  
S-Phase:  
Shape: Rectangle  
42.88 % Mean: 96.09  
Compartment 1: 18.84 %  
Compartment 2: 12.42 %  
Compartment 3: 11.62 %  
Debris: 0.03 %  
Aggregates: 0.00 %  
Modeled Events: 9642  
RCS: 1.132

## Replication 3

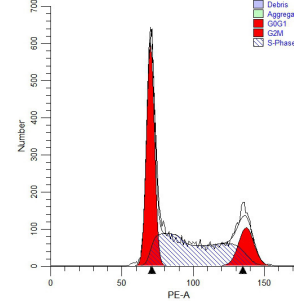

Sync Wizard Model  
File: scram.fcs  
Date acquired: 24-Jan-2024  
Date analyzed: 24-Jan-2024  
Auto Linearity: No  
G0G1:  
Position: Floating  
41.18 % Mean: 70.01  
CV: 3.86 %  
G2M:  
13.74 % Mean: 137.36  
G2/G1: 1.96  
S-Phase:  
Shape: Rectangle  
45.08 % Mean: 100.91  
Compartment 1: 19.41 %  
Compartment 2: 12.12 %  
Compartment 3: 13.54 %  
Debris: 0.19 %  
Aggregates: 0.00 %  
Modeled Events: 9949  
RCS: 1.496

miR-4664-3p inhibitor

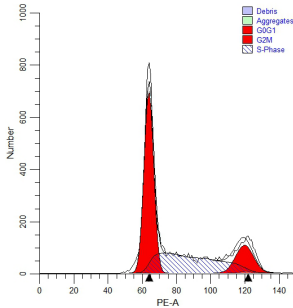

Sync Wizard Model  
File: miR-4664-3p inhibitor.fcs  
Date acquired: 24-Jan-2024  
Date analyzed: 24-Jan-2024  
Auto Linearity: No  
G0G1:  
Position: Floating  
50.72 % Mean: 63.82  
CV: 4.34 %  
G2M:  
14.65 % Mean: 119.81  
G2/G1: 1.88  
S-Phase:  
Shape: Rectangle  
34.63 % Mean: 88.53  
Compartment 1: 14.80 %  
Compartment 2: 11.44 %  
Compartment 3: 8.39 %  
Debris: 0.21 %  
Aggregates: 0.94 %  
Modeled Events: 9716  
RCS: 2.345

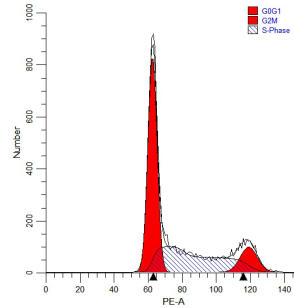

Sync Wizard Model  
File: miR-4664-3p inhibitor.fcs  
Date acquired: 24-Jan-2024  
Date analyzed: 24-Jan-2024  
Auto Linearity: No  
G0G1:  
Position: Floating  
51.87 % Mean: 62.51  
CV: 4.24 %  
G2M:  
11.42 % Mean: 119.09  
G2/G1: 1.91  
S-Phase:  
Shape: Rectangle  
36.71 % Mean: 86.94  
Compartment 1: 17.16 %  
Compartment 2: 10.21 %  
Compartment 3: 9.34 %  
Modeled Events: 10756  
RCS: 0.989

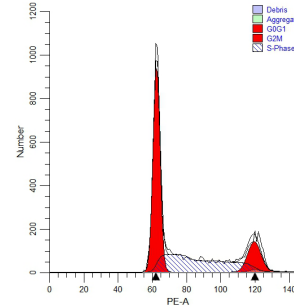

Sync Wizard Model  
File: miR-4664-3p inhibitor.fcs  
Date acquired: 24-Jan-2024  
Date analyzed: 24-Jan-2024  
Auto Linearity: No  
G0G1:  
Position: Floating  
50.73 % Mean: 62.41  
CV: 3.20 %  
G2M:  
14.18 % Mean: 119.61  
G2/G1: 1.92  
S-Phase:  
Shape: Rectangle  
35.09 % Mean: 87.29  
Compartment 1: 15.83 %  
Compartment 2: 10.44 %  
Compartment 3: 8.83 %  
Debris: 0.07 %  
Aggregates: 1.33 %  
Modeled Events: 9695  
RCS: 1.715

## Replication 1

plc5

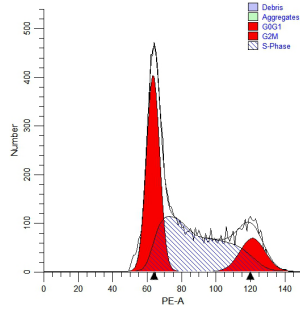

Sync Wizard Model  
 File: plc5.fcs  
 Date acquired: 04-JAN-2024  
 Date analyzed: 04-JAN-2024  
 Auto Linearity: No

GOG1:  
 Position: Floating  
 39.63 % Mean: 63.42  
 CV: 6.00 %  
 G2M:  
 12.71 % Mean: 121.21  
 G2/G1: 1.91  
 S-Phase:  
 Shape: Rectangle  
 47.66 % Mean: 88.17

Compartment 1: 22.55 %  
 Compartment 2: 13.59 %  
 Compartment 3: 11.51 %

Debris: 0.08 %  
 Aggregates: 0.00 %  
 Modeled Events: 9797  
 RCS: 1.807

## Replication 2

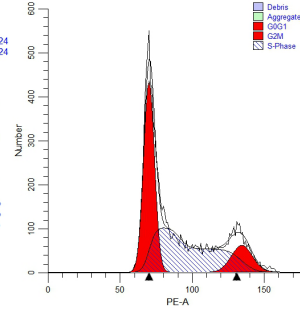

Sync Wizard Model  
 File: plc5.fcs  
 Date acquired: 04-JAN-2024  
 Date analyzed: 04-JAN-2024  
 Auto Linearity: No

GOG1:  
 Position: Floating  
 42.48 % Mean: 69.99  
 CV: 5.36 %  
 G2M:  
 11.48 % Mean: 134.50  
 G2/G1: 1.92  
 S-Phase:  
 Shape: Rectangle  
 46.04 % Mean: 97.35

Compartment 1: 22.59 %  
 Compartment 2: 11.94 %  
 Compartment 3: 11.51 %

Debris: 0.00 %  
 Aggregates: 0.27 %  
 Modeled Events: 9878  
 RCS: 1.296

## Replication 3

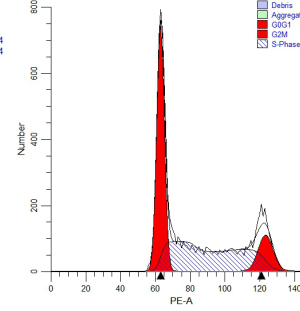

Sync Wizard Model  
 File: plc5.fcs  
 Date acquired: 04-JAN-2024  
 Date analyzed: 04-JAN-2024  
 Auto Linearity: No

GOG1:  
 Position: Floating  
 42.66 % Mean: 62.93  
 CV: 3.42 %  
 G2M:  
 12.21 % Mean: 123.41  
 G2/G1: 1.96  
 S-Phase:  
 Shape: Rectangle  
 45.14 % Mean: 91.10

Compartment 1: 18.75 %  
 Compartment 2: 12.51 %  
 Compartment 3: 13.88 %

Debris: 0.02 %  
 Aggregates: 0.05 %  
 Modeled Events: 9543  
 RCS: 1.644

Plc5-circ36683

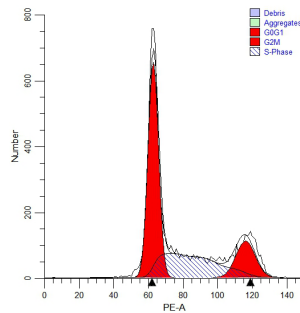

Sync Wizard Model  
 File: plc5-cir36683.fcs  
 Date acquired: 04-JAN-2024  
 Date analyzed: 04-JAN-2024  
 Auto Linearity: No

GOG1:  
 Position: Floating  
 52.32 % Mean: 62.77  
 CV: 4.79 %  
 G2M:  
 16.41 % Mean: 116.15  
 G2/G1: 1.85  
 S-Phase:  
 Shape: Rectangle  
 31.28 % Mean: 85.10

Compartment 1: 13.75 %  
 Compartment 2: 11.78 %  
 Compartment 3: 5.75 %

Debris: 0.58 %  
 Aggregates: 0.50 %  
 Modeled Events: 9614  
 RCS: 2.921

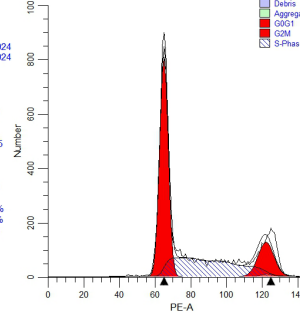

Sync Wizard Model  
 File: plc5-cir36683.fcs  
 Date acquired: 04-JAN-2024  
 Date analyzed: 04-JAN-2024  
 Auto Linearity: No

GOG1:  
 Position: Floating  
 51.29 % Mean: 64.92  
 CV: 3.62 %  
 G2M:  
 15.05 % Mean: 122.21  
 G2/G1: 1.88  
 S-Phase:  
 Shape: Rectangle  
 33.66 % Mean: 90.12

Compartment 1: 14.15 %  
 Compartment 2: 11.64 %  
 Compartment 3: 7.67 %

Debris: 0.47 %  
 Aggregates: 1.09 %  
 Modeled Events: 9518  
 RCS: 3.018

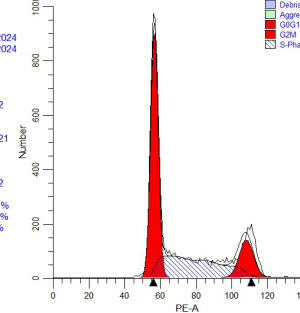

Sync Wizard Model  
 File: plc5-cir36683.fcs  
 Date acquired: 04-JAN-2024  
 Date analyzed: 04-JAN-2024  
 Auto Linearity: No

GOG1:  
 Position: Floating  
 51.34 % Mean: 56.62  
 CV: 3.66 %  
 G2M:  
 14.79 % Mean: 108.10  
 G2/G1: 1.91  
 S-Phase:  
 Shape: Rectangle  
 33.88 % Mean: 79.17

Compartment 1: 14.42 %  
 Compartment 2: 11.56 %  
 Compartment 3: 7.50 %

Debris: 0.14 %  
 Aggregates: 0.78 %  
 Modeled Events: 9442  
 RCS: 3.044

## Replication 1

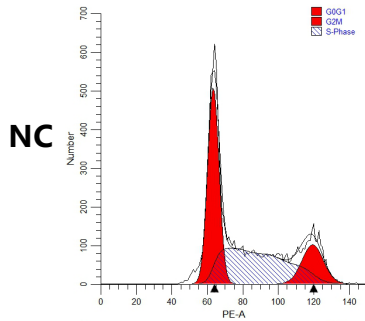

Sync Wizard Model  
File: si-nc.fcs  
Date acquired: 29-DEC-2023  
Date analyzed: 29-DEC-2023  
Auto Linearity: No

G0G1:  
Position: Floating  
41.87 % Mean: 63.33  
CV: 5.01 %

G2M:  
15.59 % Mean: 119.42  
G2/G1: 1.89

S-Phase:  
Shape: Rectangle  
42.54 % Mean: 88.14

Compartment 1: 17.70 %  
Compartment 2: 15.00 %  
Compartment 3: 9.84 %

Modeled Events: 9722  
RCS: 2.372

## Replication 2

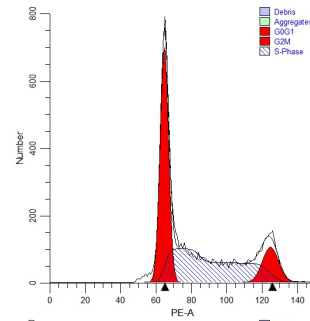

Sync Wizard Model  
File: si-nc.fcs  
Date acquired: 29-DEC-2023  
Date analyzed: 29-DEC-2023  
Auto Linearity: No

G0G1:  
Position: Floating  
43.25 % Mean: 64.67  
CV: 5.64 %

G2M:  
12.35 % Mean: 124.76  
G2/G1: 1.93

S-Phase:  
Shape: Rectangle  
44.40 % Mean: 90.84

Compartment 1: 20.57 %  
Compartment 2: 12.12 %  
Compartment 3: 11.71 %

Debris: 0.26 %  
Aggregates: 0.31 %  
Modeled Events: 9749  
RCS: 2.015

## Replication 3

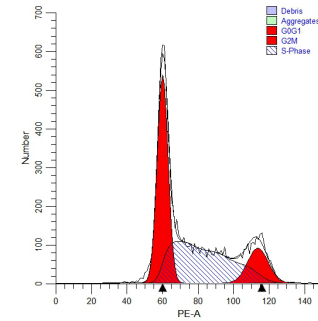

Sync Wizard Model  
File: si-nc.fcs  
Date acquired: 29-DEC-2023  
Date analyzed: 29-DEC-2023  
Auto Linearity: No

G0G1:  
Position: Floating  
42.32 % Mean: 60.02  
CV: 5.09 %

G2M:  
13.45 % Mean: 113.68  
G2/G1: 1.89

S-Phase:  
Shape: Rectangle  
44.23 % Mean: 82.85

Compartment 1: 19.71 %  
Compartment 2: 15.24 %  
Compartment 3: 9.29 %

Debris: 0.54 %  
Aggregates: 0.20 %  
Modeled Events: 9868  
RCS: 1.515

## si-circ36683

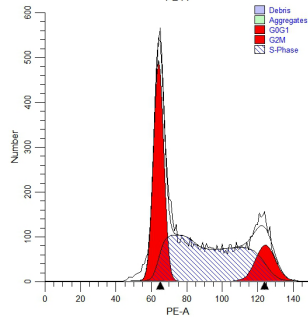

Sync Wizard Model  
File: si-cir36683.fcs  
Date acquired: 29-DEC-2023  
Date analyzed: 29-DEC-2023  
Auto Linearity: No

G0G1:  
Position: Floating  
36.56 % Mean: 64.08  
CV: 4.42 %

G2M:  
11.50 % Mean: 124.41  
G2/G1: 1.94

S-Phase:  
Shape: Rectangle  
51.94 % Mean: 92.28

Compartment 1: 21.38 %  
Compartment 2: 14.72 %  
Compartment 3: 15.84 %

Debris: 0.34 %  
Aggregates: 0.00 %  
Modeled Events: 9860  
RCS: 2.752

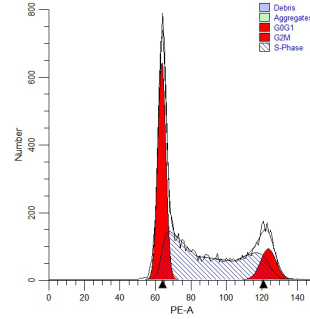

Sync Wizard Model  
File: si-cir36683.fcs  
Date acquired: 29-DEC-2023  
Date analyzed: 29-DEC-2023  
Auto Linearity: No

G0G1:  
Position: Floating  
37.52 % Mean: 63.55  
CV: 3.50 %

G2M:  
10.09 % Mean: 123.64  
G2/G1: 1.95

S-Phase:  
Shape: Trapezoid  
52.38 % Mean: 90.04

Compartment 1: 24.11 %  
Compartment 2: 12.52 %  
Compartment 3: 15.75 %

Debris: 0.17 %  
Aggregates: 0.25 %  
Modeled Events: 9867  
RCS: 1.653

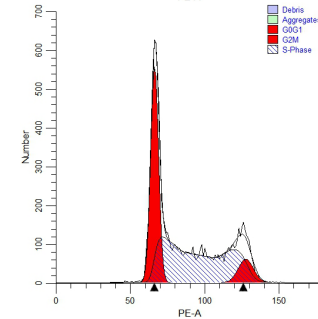

Sync Wizard Model  
File: si-cir36683.fcs  
Date acquired: 29-DEC-2023  
Date analyzed: 29-DEC-2023  
Auto Linearity: No

G0G1:  
Position: Floating  
37.64 % Mean: 66.23  
CV: 3.98 %

G2M:  
7.86 % Mean: 127.63  
G2/G1: 1.93

S-Phase:  
Shape: Trapezoid  
54.50 % Mean: 95.36

Compartment 1: 22.04 %  
Compartment 2: 14.58 %  
Compartment 3: 17.88 %

Debris: 0.46 %  
Aggregates: 0.18 %  
Modeled Events: 9923  
RCS: 0.947

## Replication 1

pcDNA-CDK2AP2  
+ NC

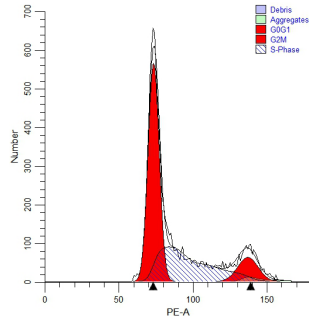

Sync Wizard Model  
File: pcDNA-CDK2AP2+NC.fcs  
Date acquired: 27-DEC-2023  
Date analyzed: 27-DEC-2023  
Auto Linearity: No

G0/G1:  
Position: Floating  
53.80 % Mean: 73.33  
CV: 5.05 %  
G2M:  
11.05 % Mean: 137.08  
G2/G1: 1.87  
S-Phase:  
Shape: Rectangle  
35.15 % Mean: 97.06

Compartment 1: 19.54 %  
Compartment 2: 9.96 %  
Compartment 3: 5.65 %

Debris: 0.06 %  
Aggregates: 2.34 %  
Modeled Events: 10077  
RCS: 1.250

## Replication 2

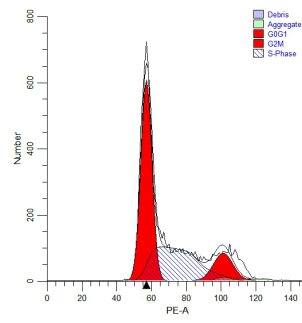

Sync Wizard Model  
File: pcDNA-CDK2AP2+NC.fcs  
Date acquired: 27-DEC-2023  
Date analyzed: 27-DEC-2023  
Auto Linearity: No

G0/G1:  
Position: Floating  
51.84 % Mean: 56.99  
CV: 5.53 %  
G2M:  
12.49 % Mean: 101.17  
G2/G1: 1.78  
S-Phase:  
Shape: Rectangle  
35.67 % Mean: 74.50

Compartment 1: 16.18 %  
Compartment 2: 14.96 %  
Compartment 3: 4.53 %

Debris: 0.03 %  
Aggregates: 1.99 %  
Modeled Events: 9486  
RCS: 3.246

## Replication 3

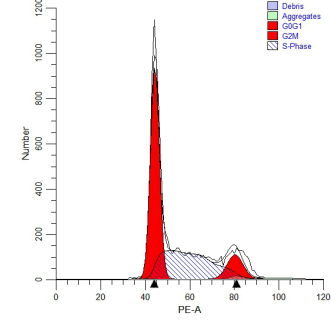

Sync Wizard Model  
File: pcDNA-CDK2AP2+NC.fcs  
Date acquired: 27-DEC-2023  
Date analyzed: 27-DEC-2023  
Auto Linearity: No

G0/G1:  
Position: Floating  
51.21 % Mean: 44.32  
CV: 4.45 %  
G2M:  
10.55 % Mean: 80.29  
G2/G1: 1.81  
S-Phase:  
Shape: Rectangle  
38.24 % Mean: 59.65

Compartment 1: 16.34 %  
Compartment 2: 14.41 %  
Compartment 3: 7.48 %

Debris: 0.20 %  
Aggregates: 1.92 %  
Modeled Events: 9417  
RCS: 3.379

pcDNA-CDK2AP2  
+ miR-4664-3p

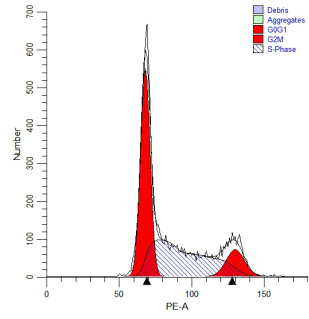

Sync Wizard Model  
File: pcDNA-CDK2AP2+miR-4664-3p.fcs  
Date acquired: 27-DEC-2023  
Date analyzed: 27-DEC-2023  
Auto Linearity: No

G0/G1:  
Position: Floating  
48.23 % Mean: 67.90  
CV: 4.88 %  
G2M:  
11.33 % Mean: 130.00  
G2/G1: 1.91  
S-Phase:  
Shape: Rectangle  
42.44 % Mean: 94.06

Compartment 1: 20.19 %  
Compartment 2: 12.53 %  
Compartment 3: 9.72 %

Debris: 0.27 %  
Aggregates: 0.41 %  
Modeled Events: 9966  
RCS: 1.851

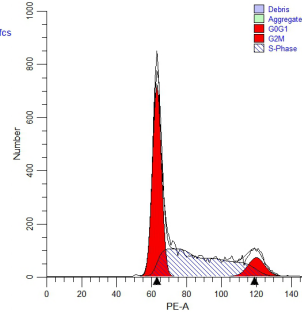

Sync Wizard Model  
File: pcDNA-CDK2AP2+miR-4664-3p.fcs  
Date acquired: 27-DEC-2023  
Date analyzed: 27-DEC-2023  
Auto Linearity: No

G0/G1:  
Position: Floating  
47.10 % Mean: 63.02  
CV: 3.95 %  
G2M:  
8.73 % Mean: 119.97  
G2/G1: 1.90  
S-Phase:  
Shape: Rectangle  
44.17 % Mean: 87.38

Compartment 1: 20.37 %  
Compartment 2: 13.33 %  
Compartment 3: 10.48 %

Debris: 0.10 %  
Aggregates: 0.67 %  
Modeled Events: 9736  
RCS: 1.402

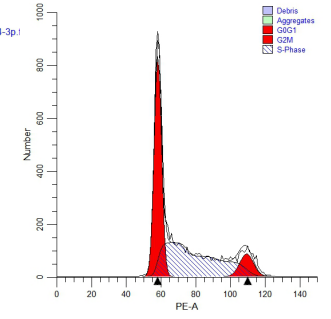

Sync Wizard Model  
File: pcDNA-CDK2AP2+miR-4664-3p.fcs  
Date acquired: 27-DEC-2023  
Date analyzed: 27-DEC-2023  
Auto Linearity: No

G0/G1:  
Position: Floating  
45.55 % Mean: 58.15  
CV: 3.59 %  
G2M:  
8.78 % Mean: 109.33  
G2/G1: 1.88  
S-Phase:  
Shape: Rectangle  
45.67 % Mean: 79.12

Compartment 1: 22.49 %  
Compartment 2: 13.33 %  
Compartment 3: 9.85 %

Debris: 0.10 %  
Aggregates: 0.24 %  
Modeled Events: 9714  
RCS: 1.560

**si-circ36683  
+ pcDNA3.1**

### Replication 1

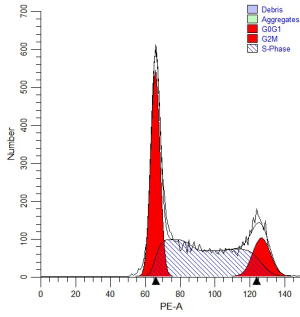

Sync Wizard Model  
File: si-cir36683+pcDNA3.1.fcs  
Date acquired: 11-JAN-2024  
Date analyzed: 6-Feb-2024  
Auto Linearity: No  
G0G1:  
Position: Floating  
37.28 % Mean: 65.72  
CV: 4.00 %  
G2M:  
13.35 % Mean: 126.74  
G2/G1: 1.93  
S-Phase:  
Shape: Rectangle  
49.37 % Mean: 94.27  
Debris: 0.21 %  
Aggregates: 0.00 %  
Modeled Events: 9753  
RCS: 1.538

### Replication 2

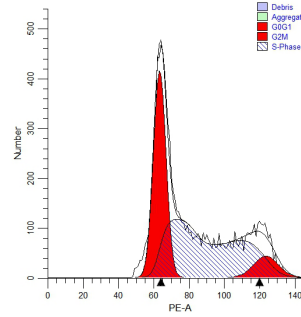

Sync Wizard Model  
File: si-cir36683+pcDNA3.1.fcs  
Date acquired: 11-JAN-2024  
Date analyzed: 6-Feb-2024  
Auto Linearity: No  
G0G1:  
Position: Floating  
38.34 % Mean: 63.31  
CV: 5.62 %  
G2M:  
7.77 % Mean: 123.56  
G2/G1: 1.95  
S-Phase:  
Shape: Rectangle  
53.89 % Mean: 90.64  
Debris: 0.15 %  
Aggregates: 0.00 %  
Modeled Events: 9729  
RCS: 2.719

### Replication 3

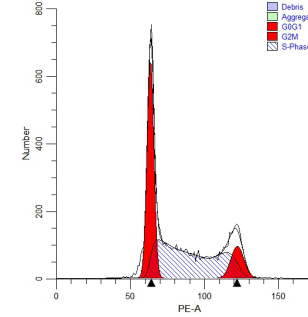

Sync Wizard Model  
File: si-cir36683+pcDNA3.1.fcs  
Date acquired: 11-JAN-2024  
Date analyzed: 6-Feb-2024  
Auto Linearity: No  
G0G1:  
Position: Floating  
38.62 % Mean: 63.46  
CV: 3.57 %  
G2M:  
10.77 % Mean: 122.20  
G2/G1: 1.93  
S-Phase:  
Shape: Trapezoid  
50.61 % Mean: 90.40  
Debris: 0.47 %  
Aggregates: 0.21 %  
Modeled Events: 9740  
RCS: 1.884

**si-circ36683  
+ pcDNA-CDK2AP2**

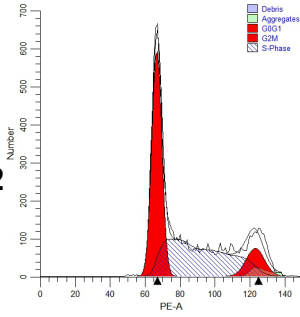

Sync Wizard Model  
File: si-cir36683+pcDNA-CDK2AP2.fcs  
Date acquired: 11-JAN-2024  
Date analyzed: 6-Feb-2024  
Auto Linearity: No  
G0G1:  
Position: Floating  
45.32 % Mean: 66.65  
CV: 4.25 %  
G2M:  
10.34 % Mean: 123.11  
G2/G1: 1.85  
S-Phase:  
Shape: Rectangle  
44.34 % Mean: 91.37  
Debris: 0.19 %  
Aggregates: 3.41 %  
Modeled Events: 9770  
RCS: 1.785

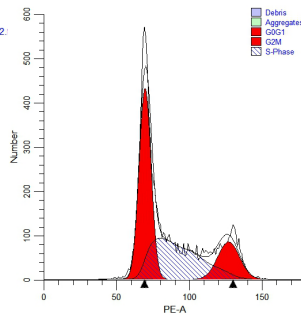

Sync Wizard Model  
File: si-cir36683+pcDNA-CDK2AP2.fcs  
Date acquired: 11-JAN-2024  
Date analyzed: 6-Feb-2024  
Auto Linearity: No  
G0G1:  
Position: Floating  
45.58 % Mean: 69.43  
CV: 5.88 %  
G2M:  
16.33 % Mean: 126.92  
G2/G1: 1.83  
S-Phase:  
Shape: Rectangle  
38.09 % Mean: 92.12  
Debris: 0.47 %  
Aggregates: 0.23 %  
Modeled Events: 9835  
RCS: 1.841

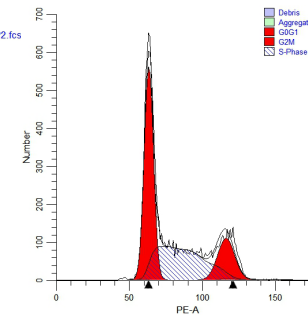

Sync Wizard Model  
File: si-cir36683+pcDNA-CDK2AP2.fcs  
Date acquired: 11-JAN-2024  
Date analyzed: 6-Feb-2024  
Auto Linearity: No  
G0G1:  
Position: Floating  
45.65 % Mean: 63.24  
CV: 4.97 %  
G2M:  
16.32 % Mean: 116.24  
G2/G1: 1.84  
S-Phase:  
Shape: Rectangle  
38.03 % Mean: 85.96  
Debris: 0.27 %  
Aggregates: 0.62 %  
Modeled Events: 9837  
RCS: 1.827

**plc5-circ36683  
+NC**

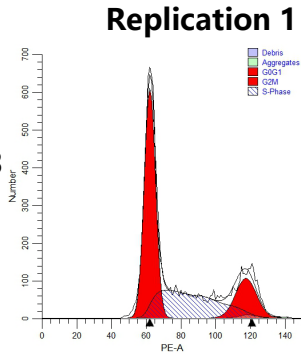

**Replication 2**

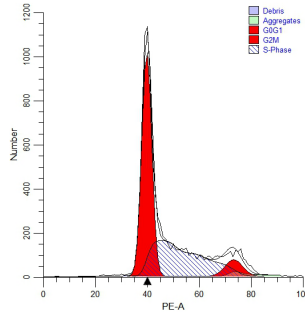

**Replication 3**

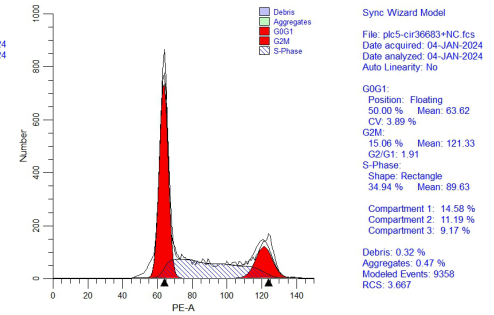

**plc5-circ36683  
+miR-4664-3p**

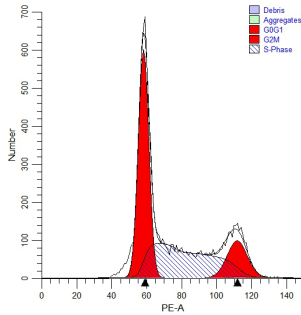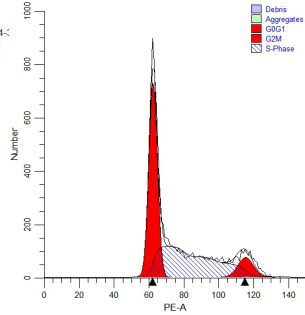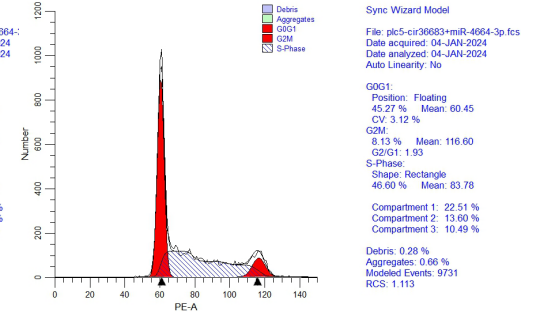

**plc5-circ36683  
+si-CDK2AP2**

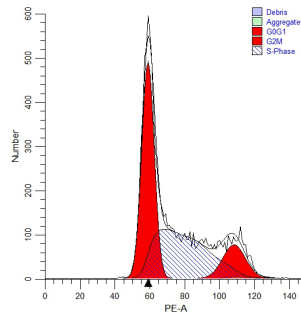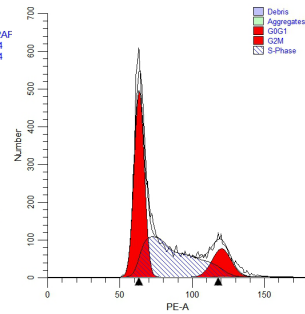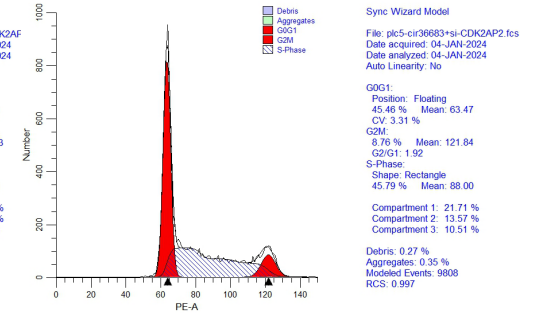

Supplement: TCA-15-1929-s003.pdf [file TCA-15-1929-s003.pdf]
