# Supplementary material for: Novel circular RNA hsa_circ_0036683 suppresses proliferation and migration by mediating the miR‐4664‐3p/CDK2AP2 axis in non‐small cell lung cancer
Source: PubMed Central journal article supplement — Thorac Cancer. 2024 Aug 7;15(27):1929–45. doi: 10.1111/1759-7714.15396 (PMC11462936; doi:10.1111/1759-7714.15396), 2024-08-07

# Expression of CDK2AP2 in A549

## Replication 1

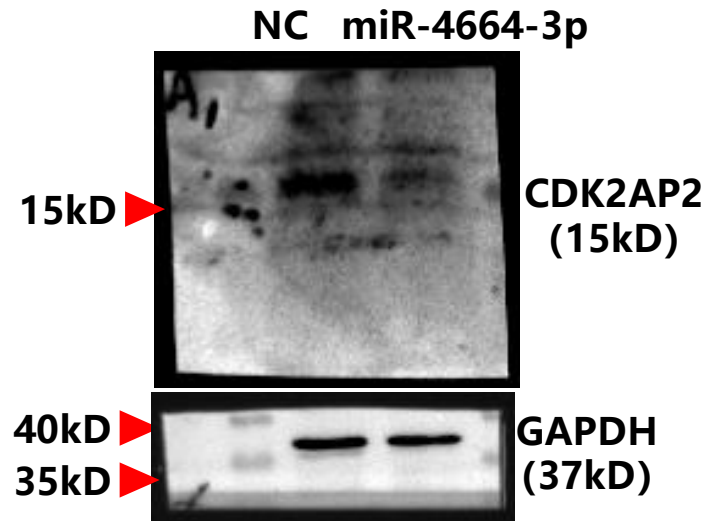

Scram miR-4664-3p  
inhibitor

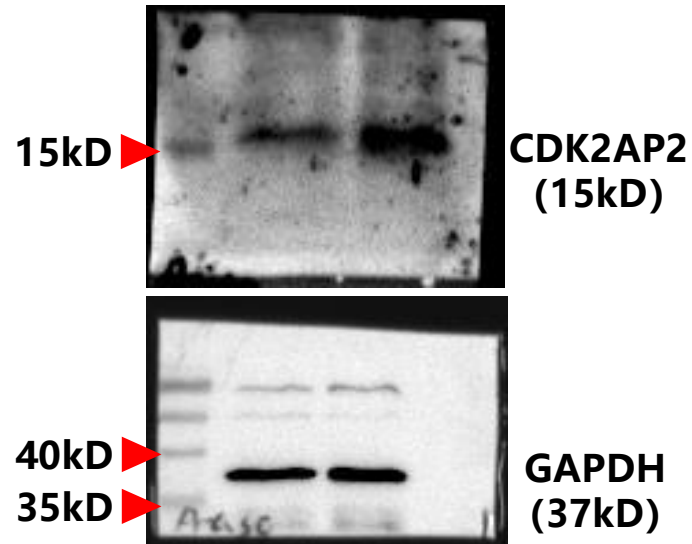

## Replication 2

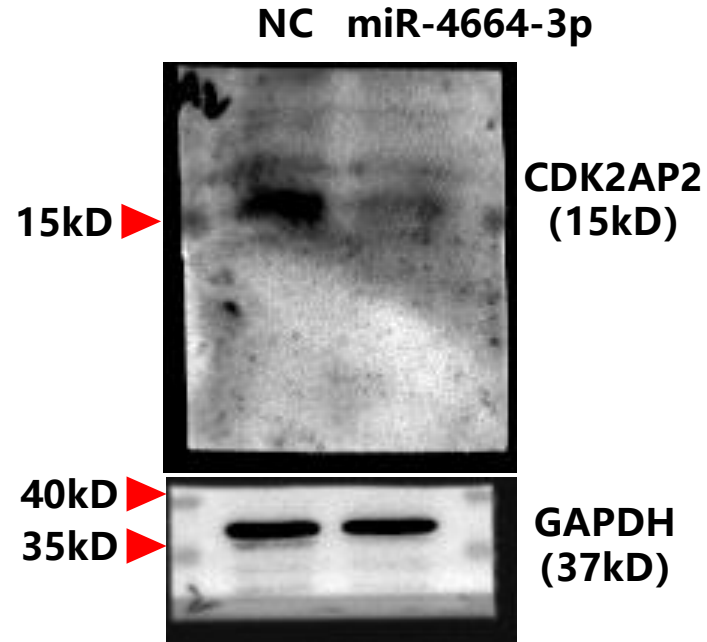

Scram miR-4664-3p  
inhibitor

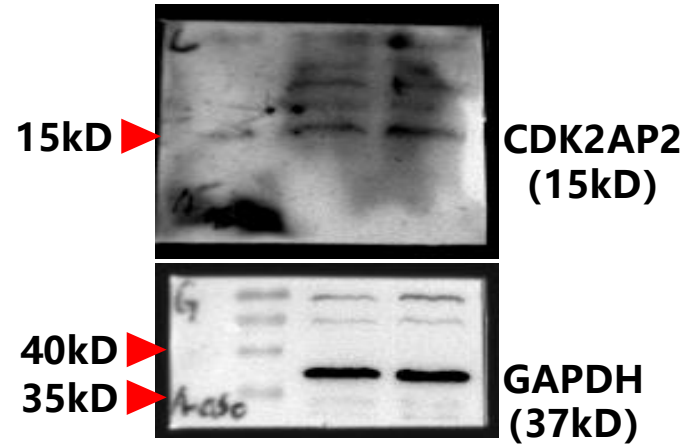

## Replication 3

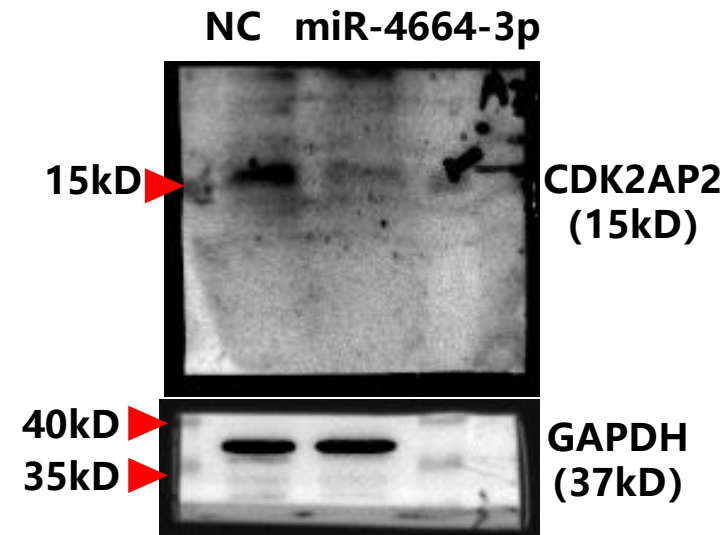

Scram miR-4664-3p  
inhibitor

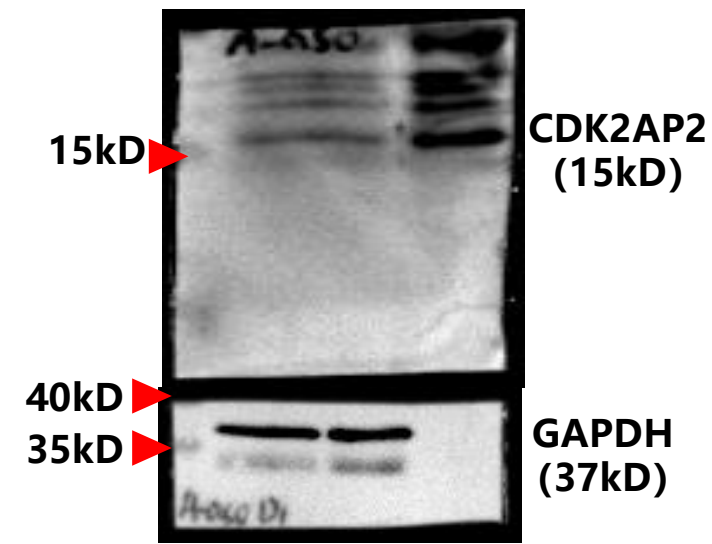

# Replication 1

plc5 plc5-circ36683

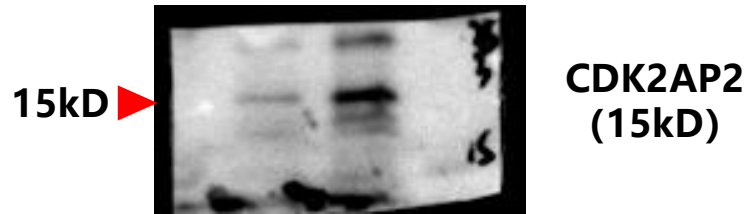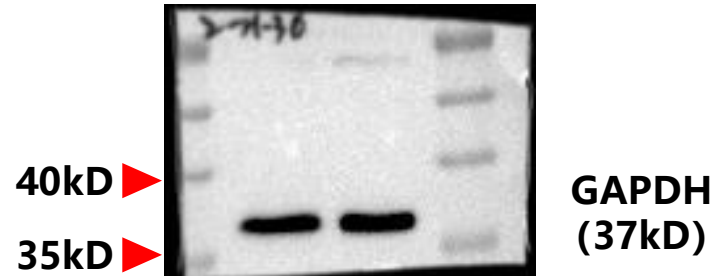

NC si-circ36683

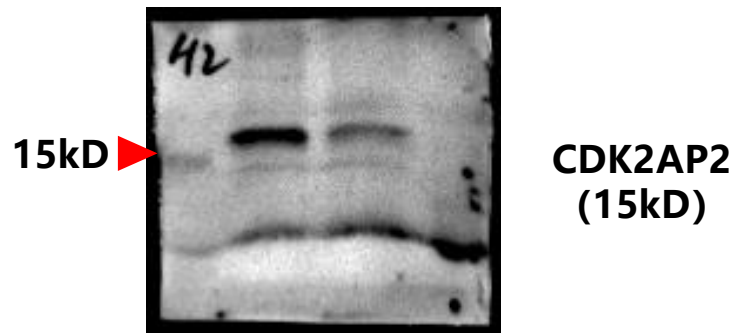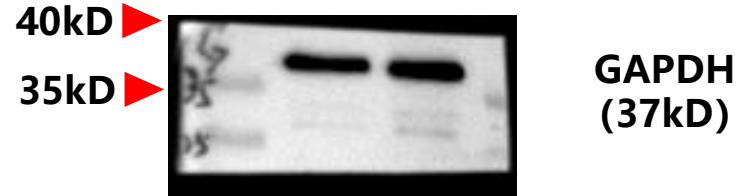

# Replication 2

plc5 plc5-circ36683

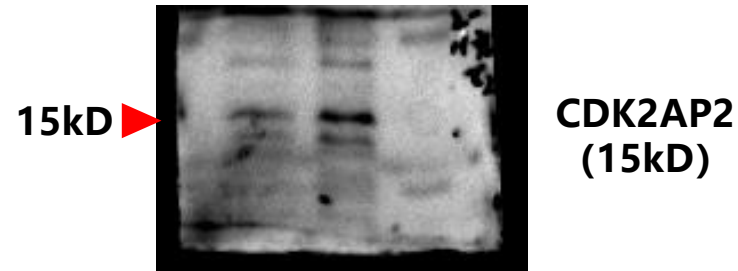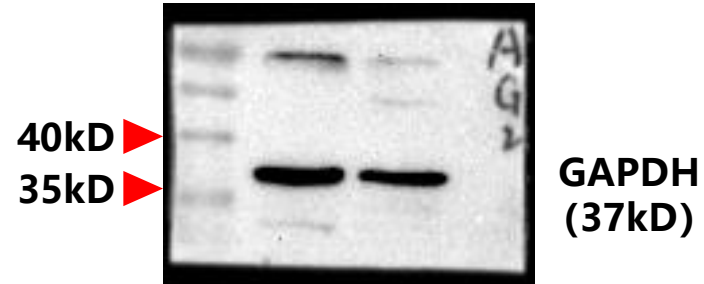

NC si-circ36683

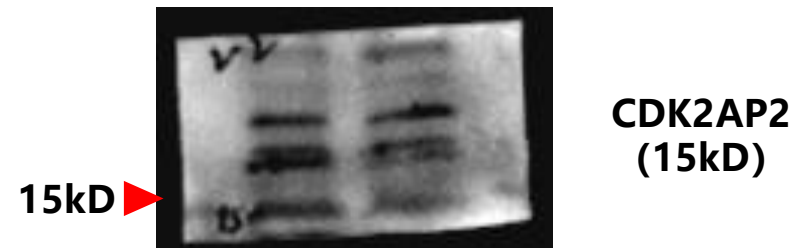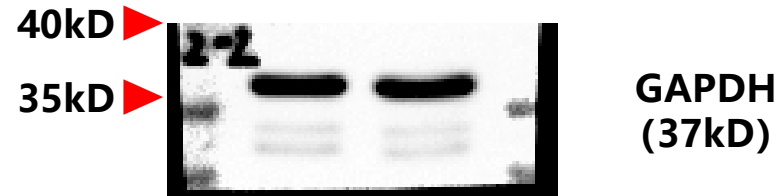

# Replication 3

plc5 plc5-circ36683

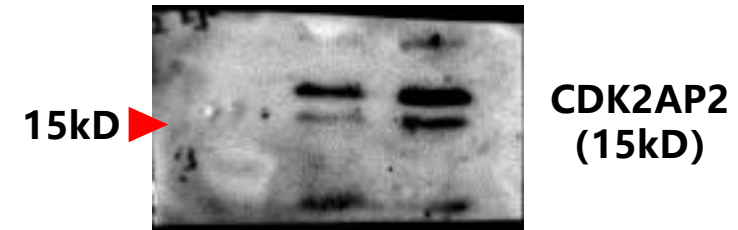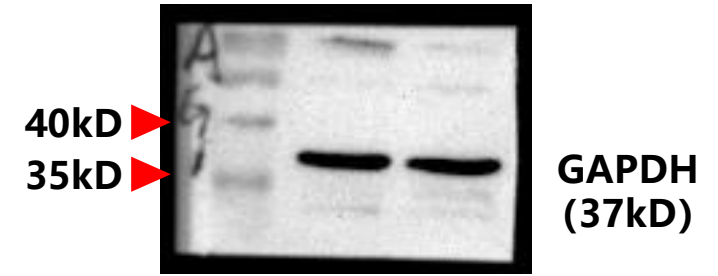

NC si-circ36683

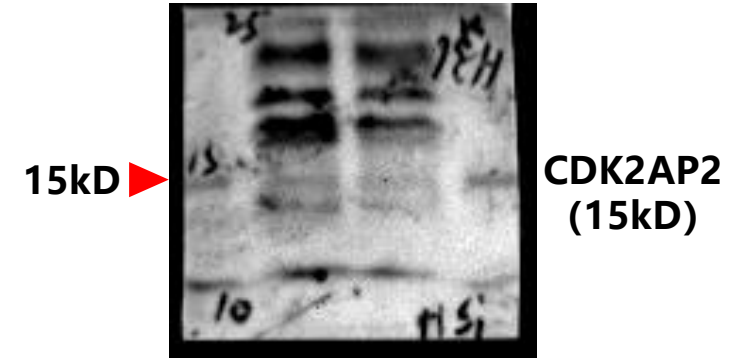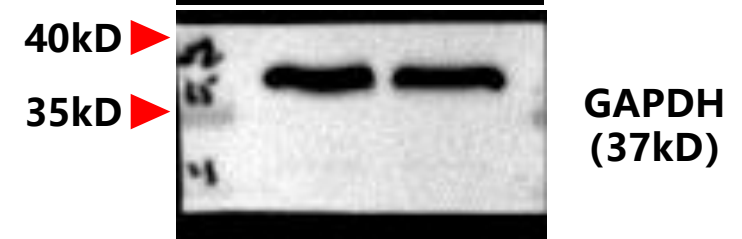

# Expression of CDK2AP2 in xenograft

## Replication 1

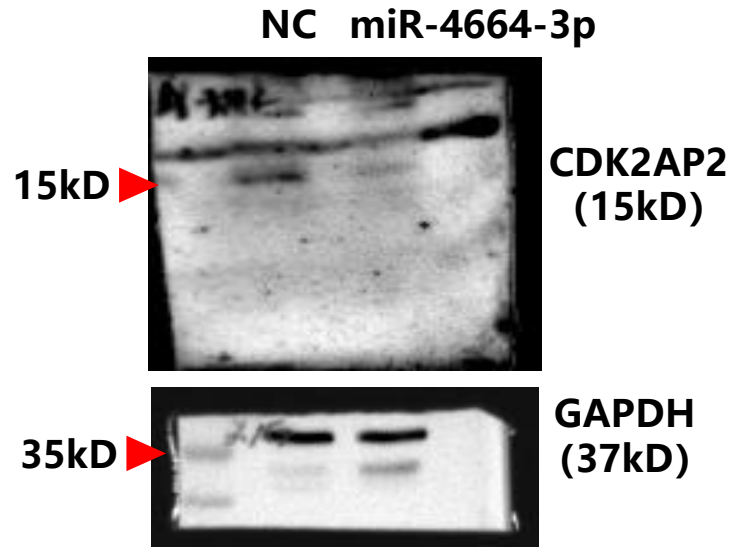

## Replication 2

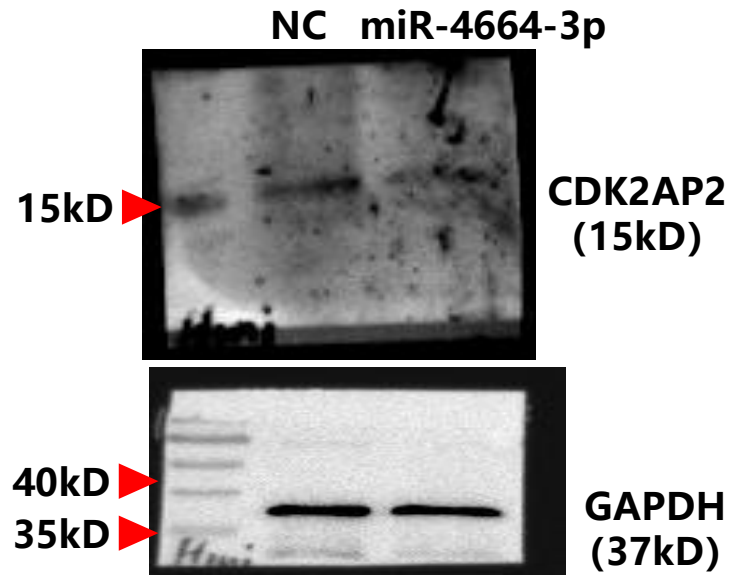

## Replication 3

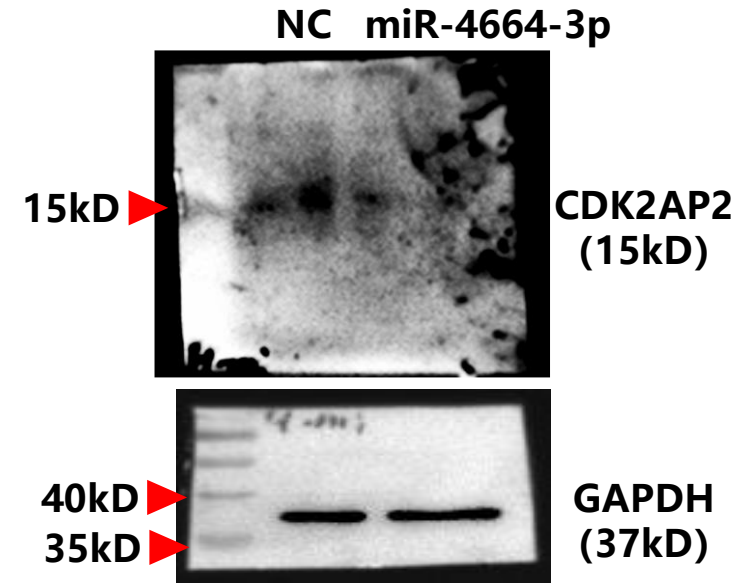

## Scram miR-4664-3p inhibitor

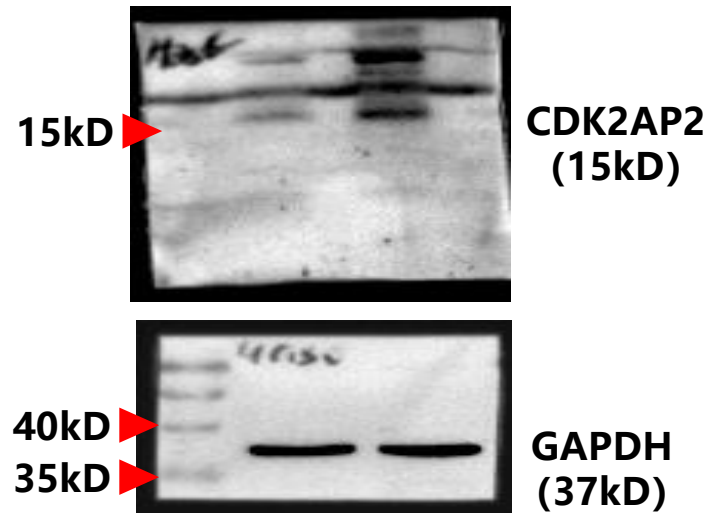

## Scram miR-4664-3p inhibitor

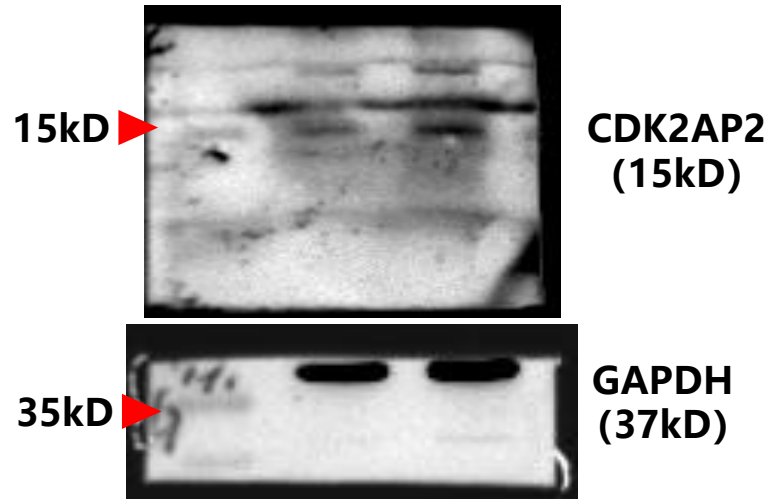

## Scram miR-4664-3p inhibitor

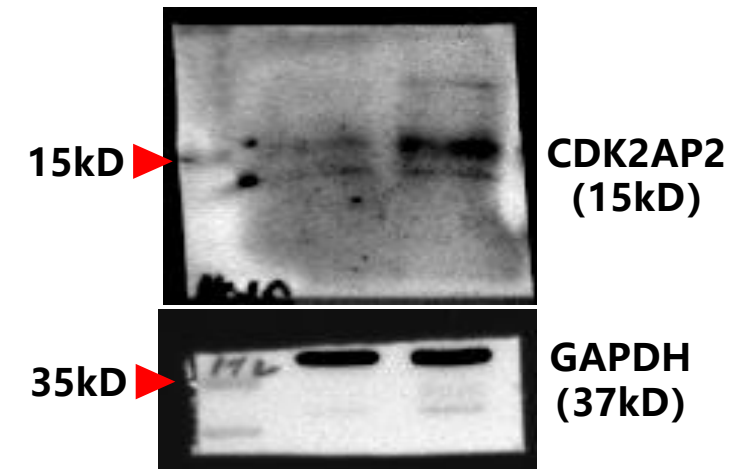

# Replication 1

plc5 plc5-circ36683

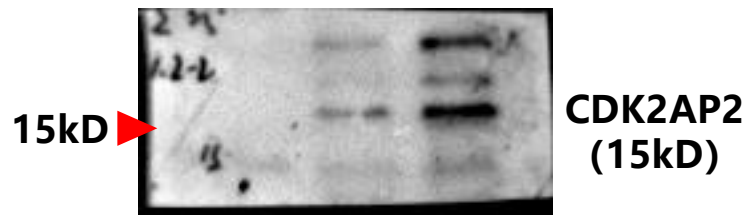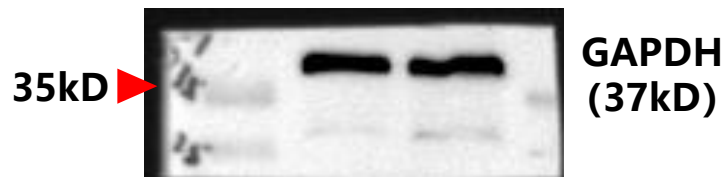

NC si-circ36683

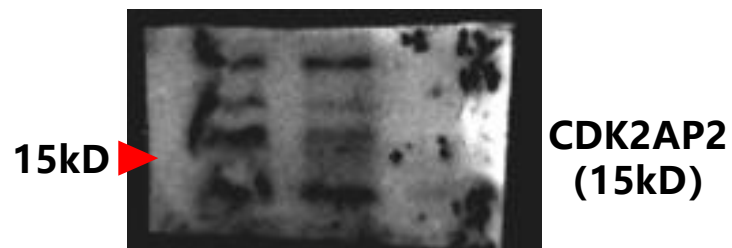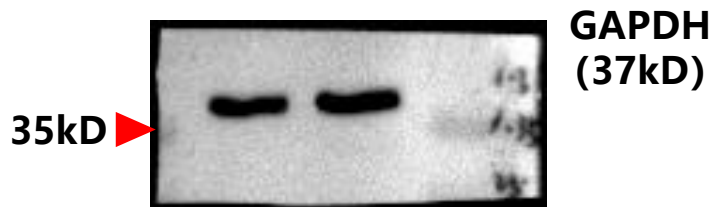

# Replication 2

plc5 plc5-circ36683

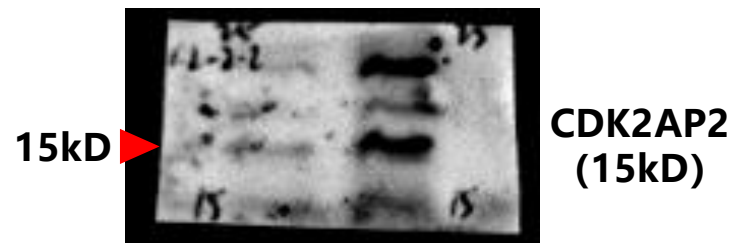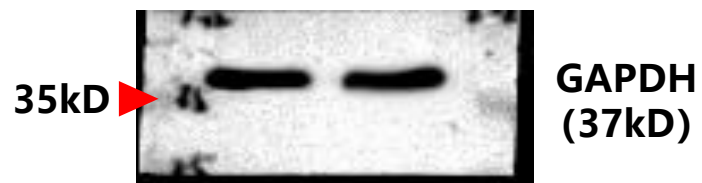

NC si-circ36683

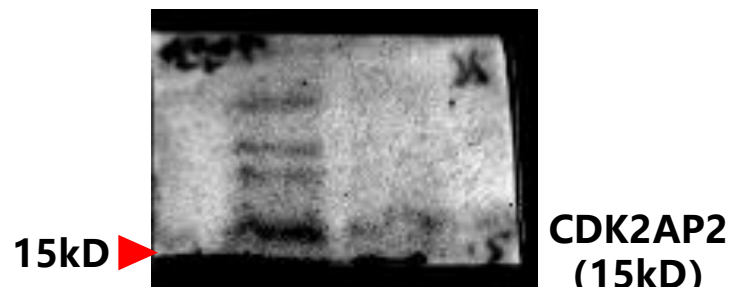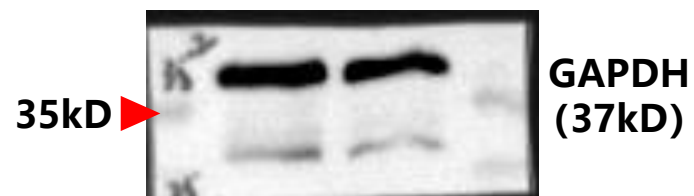

# Replication 3

plc5 plc5-circ36683

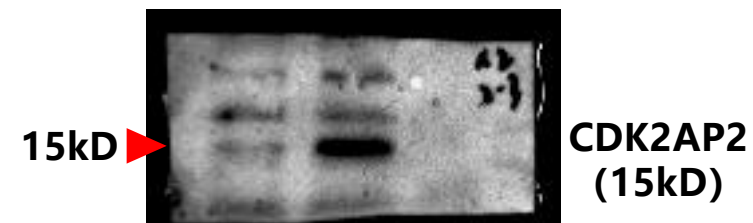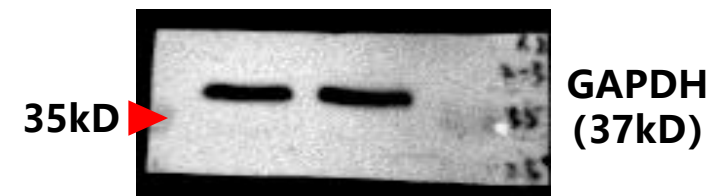

NC si-circ36683

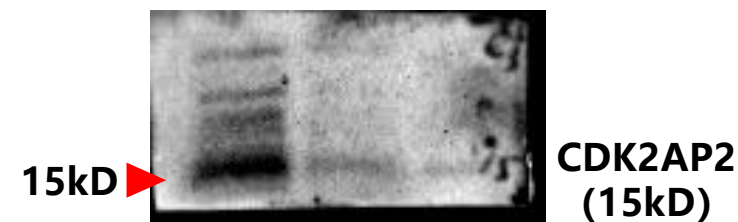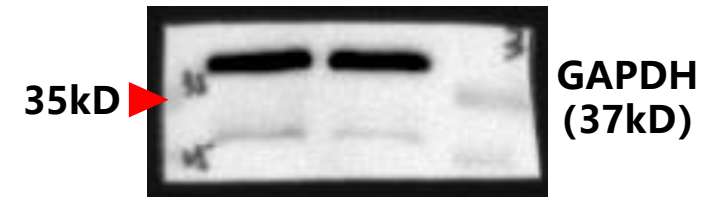

# Expression of related factors of cyclinE-CDK2 pathway in A549

## Replication 1

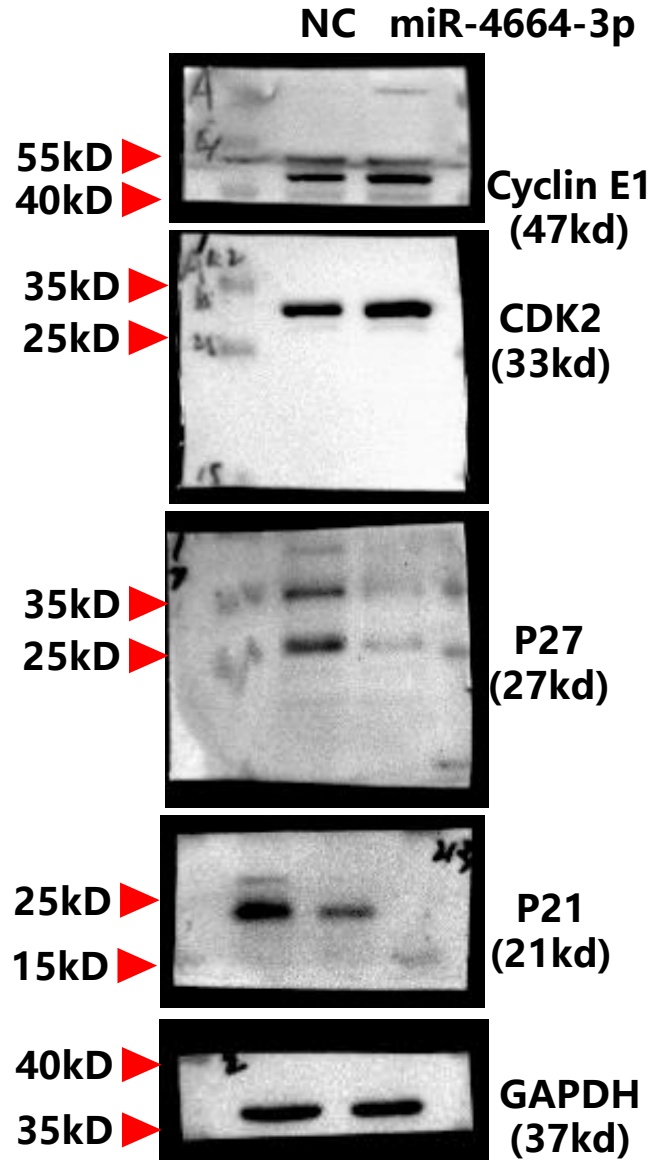

## Replication 2

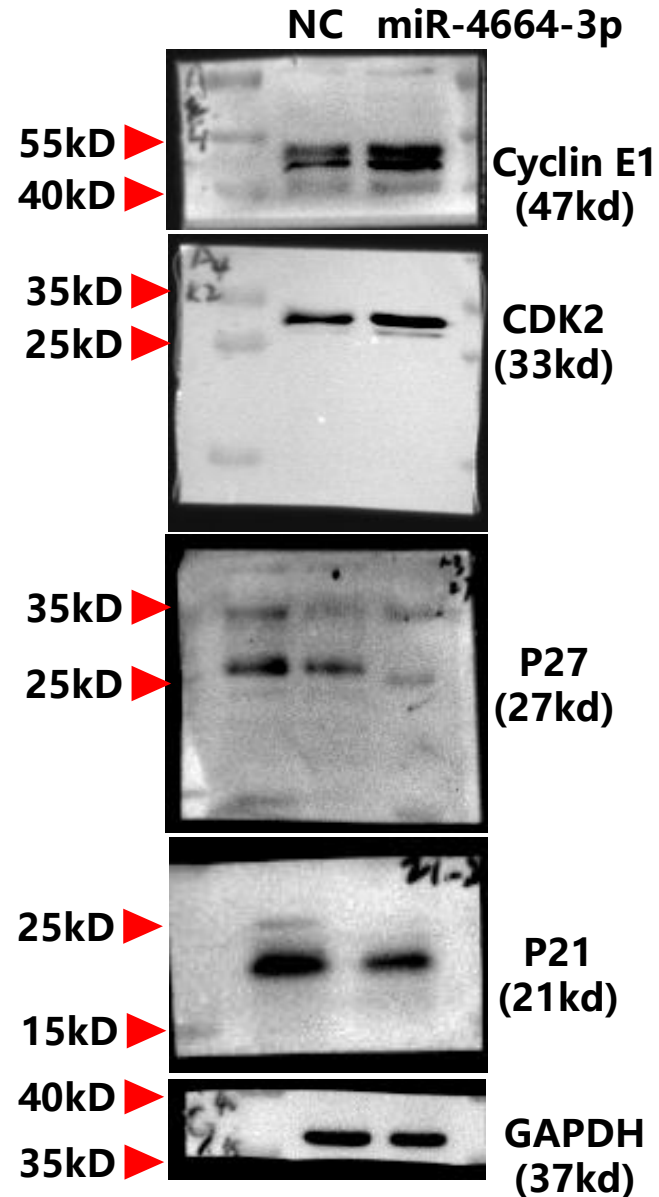

## Replication 3

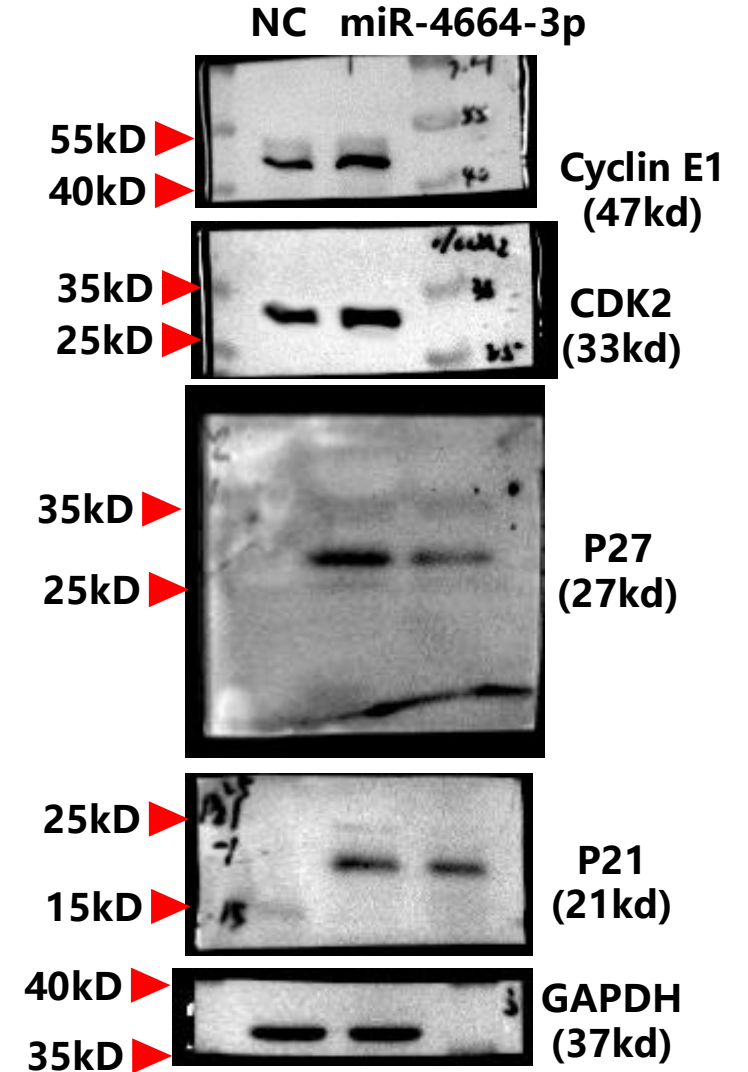

# Replication 1

Scram miR-4664-3p inhibitor

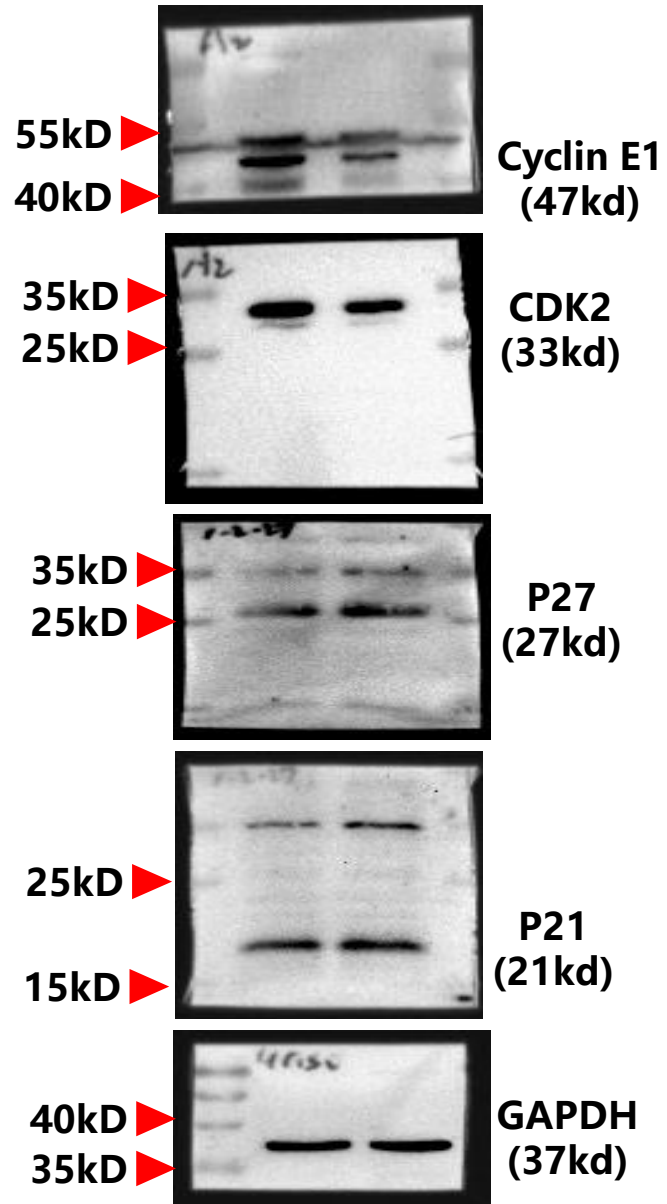

# Replication 2

Scram miR-4664-3p inhibitor

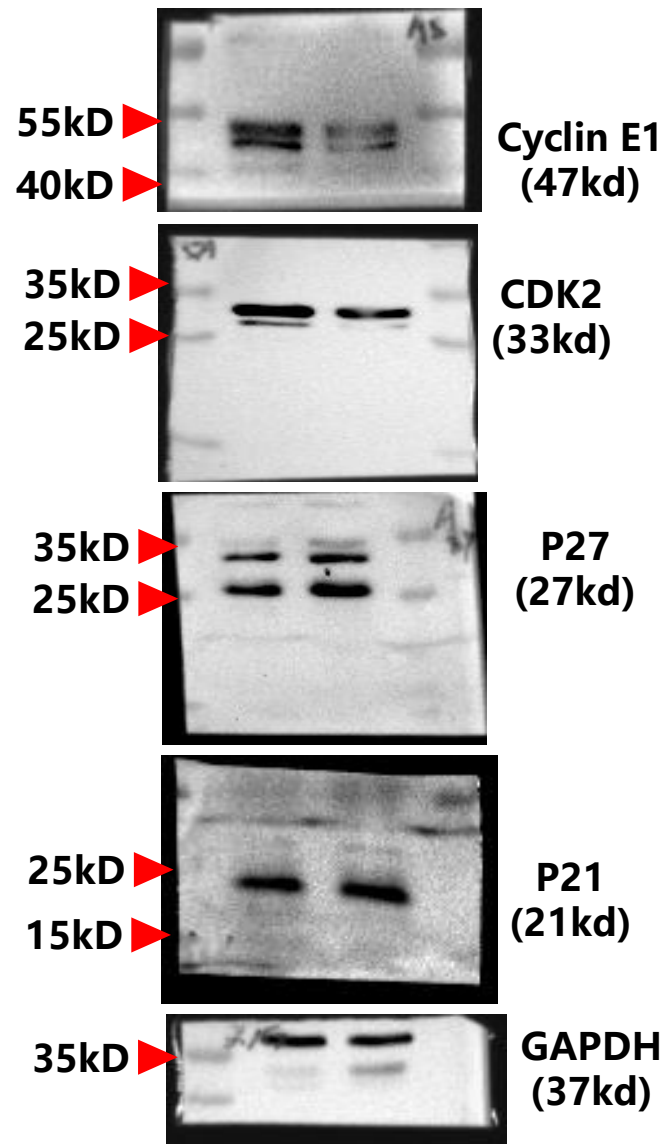

# Replication 3

Scram miR-4664-3p inhibitor

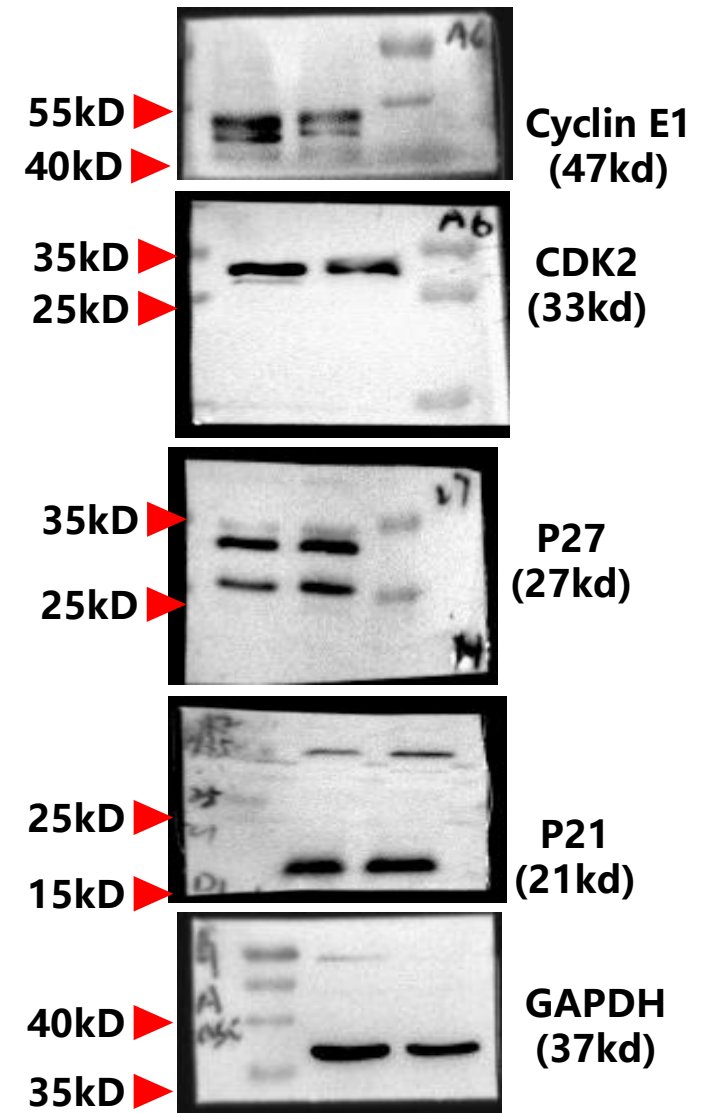

# Replication 1

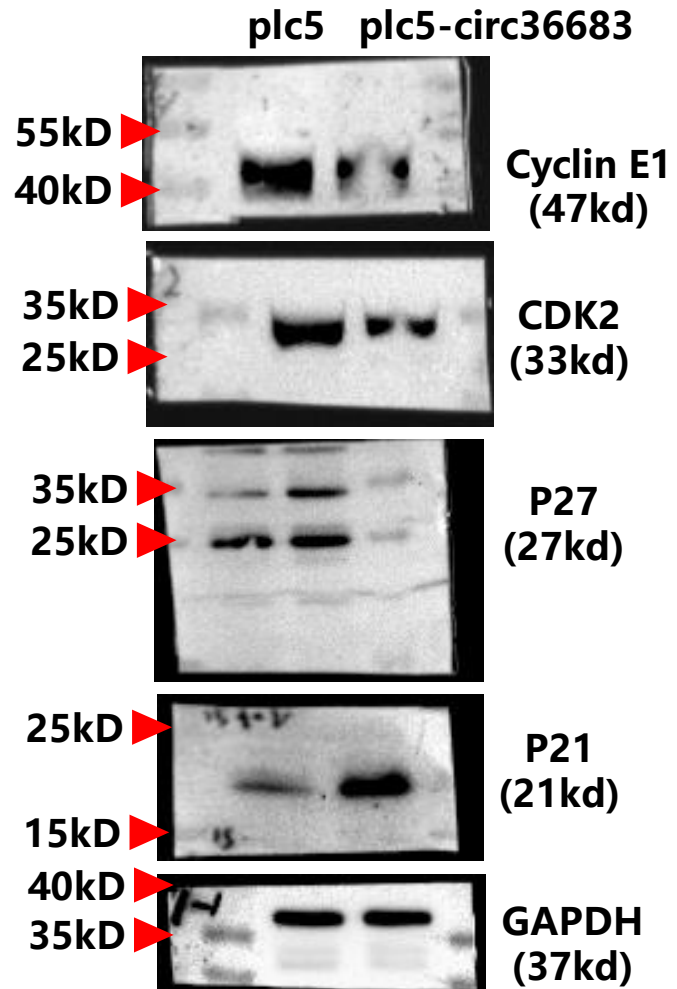

# Replication 2

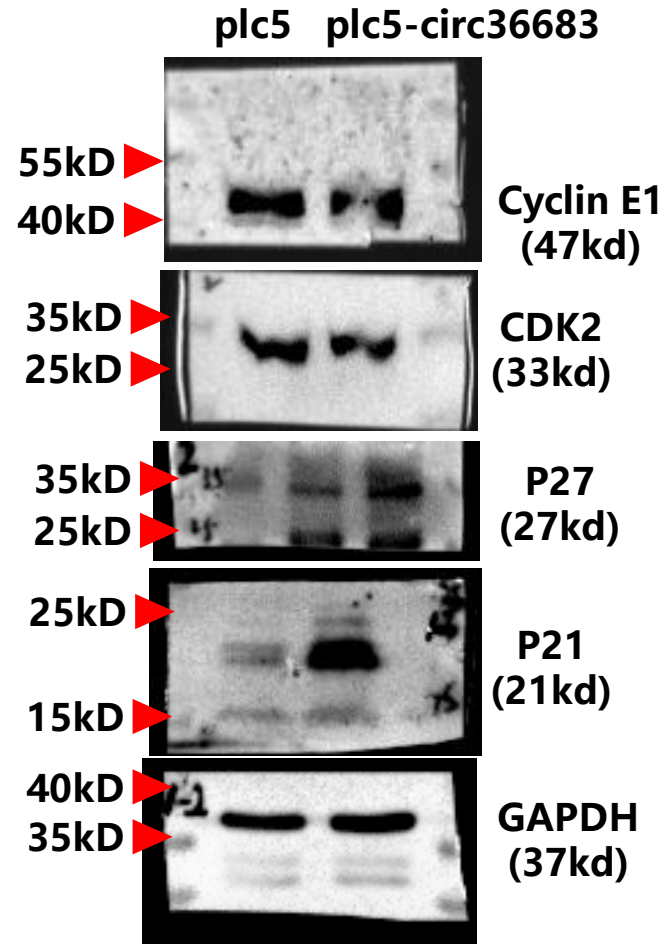

# Replication 3

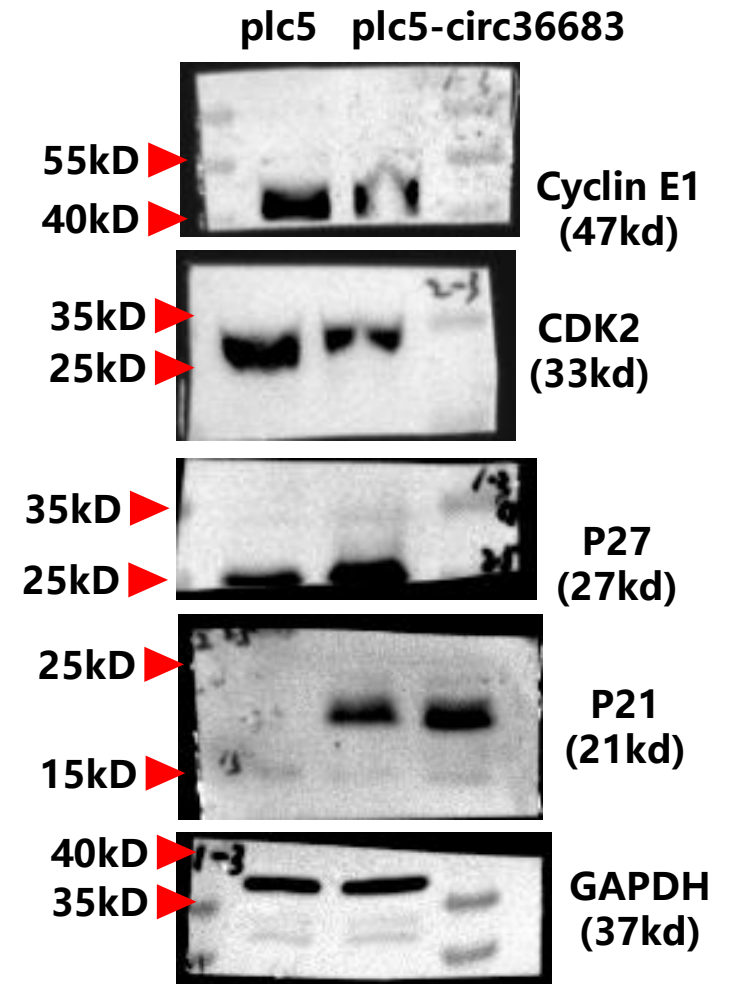

# Replication 1

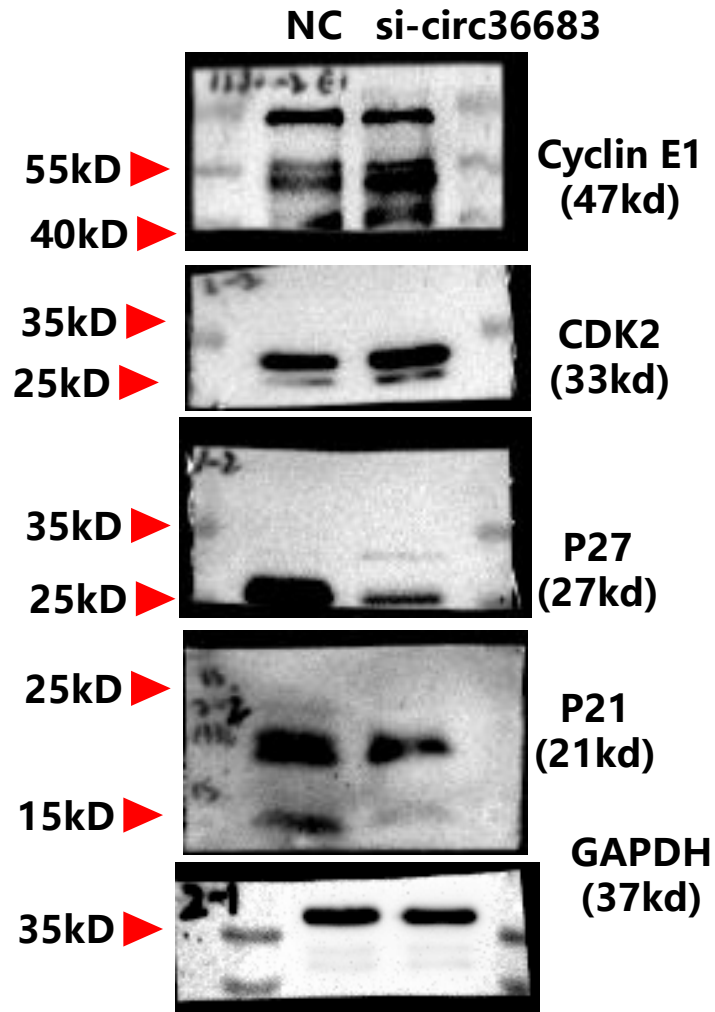

# Replication 2

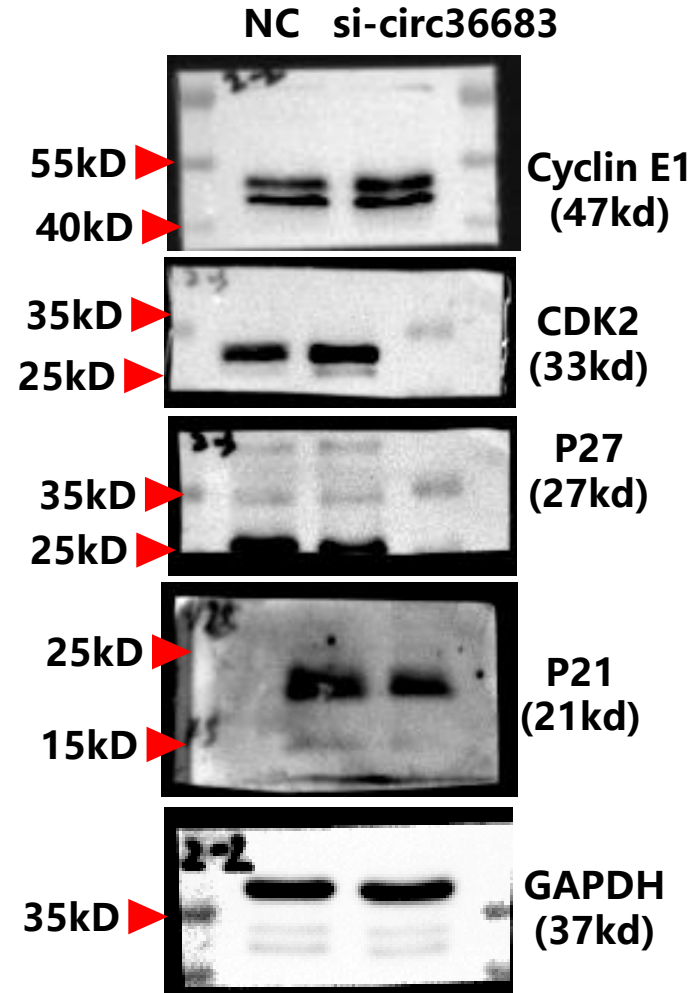

# Replication 3

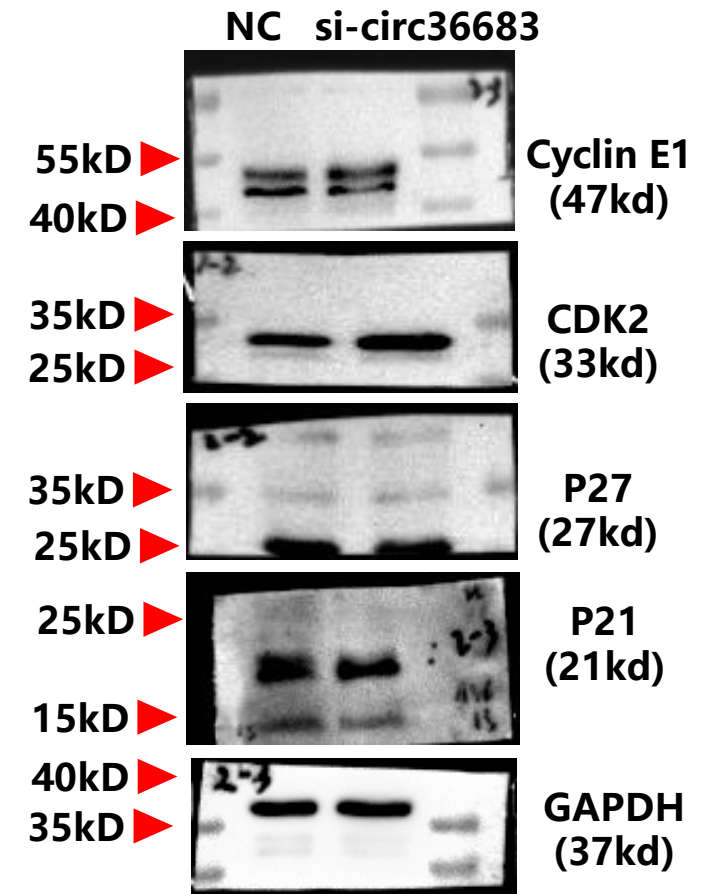



# Expression of related factors of cyclinE-CDK2 pathway in xenograft

## Replication 1

NC miR-4664-3p

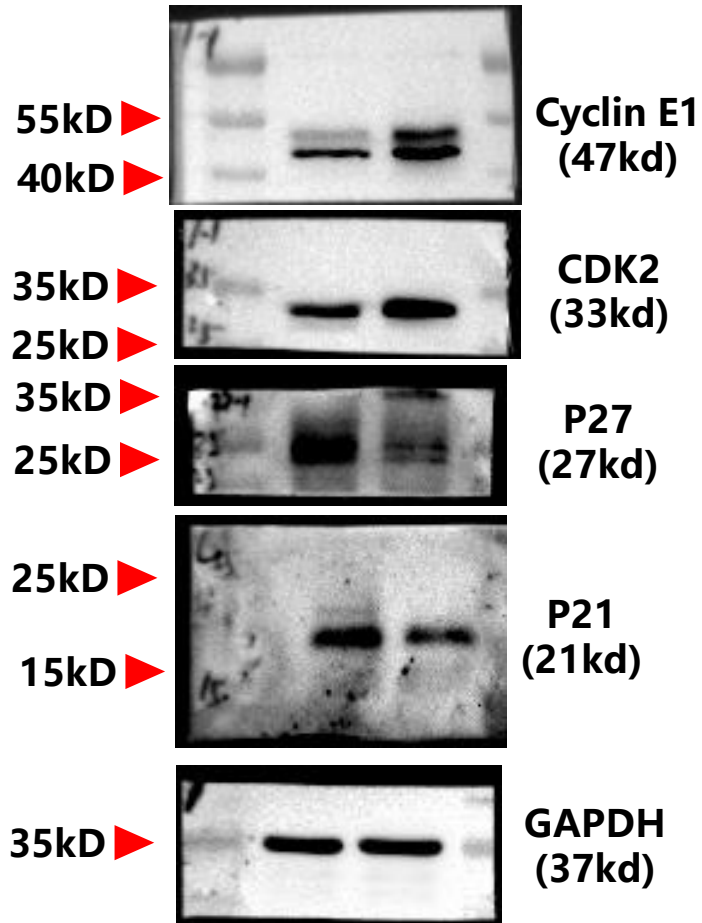

## Replication 2

NC miR-4664-3p

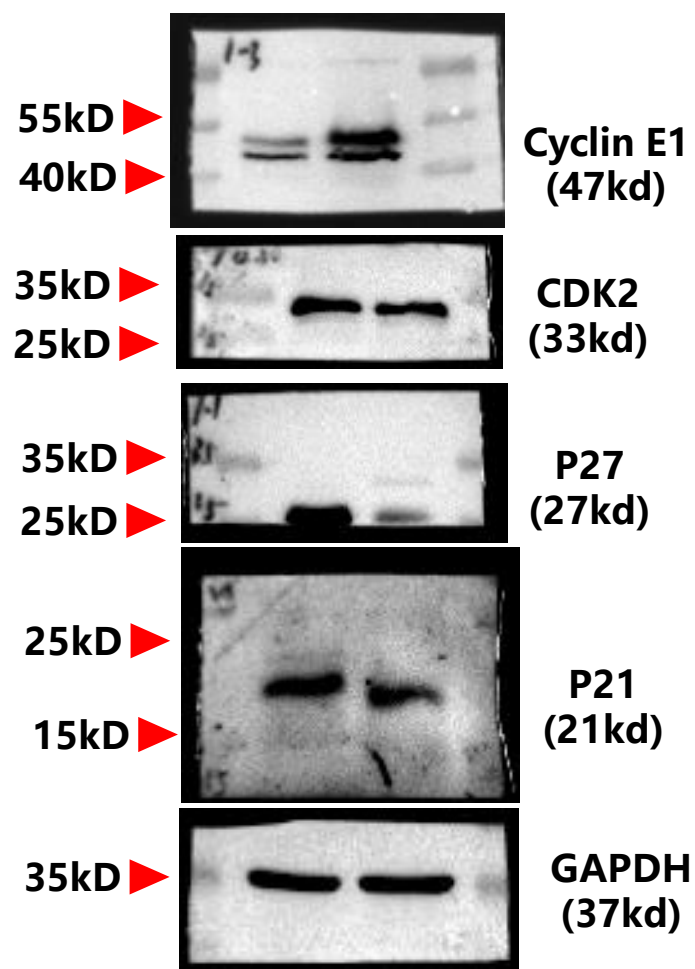

## Replication 3

NC miR-4664-3p

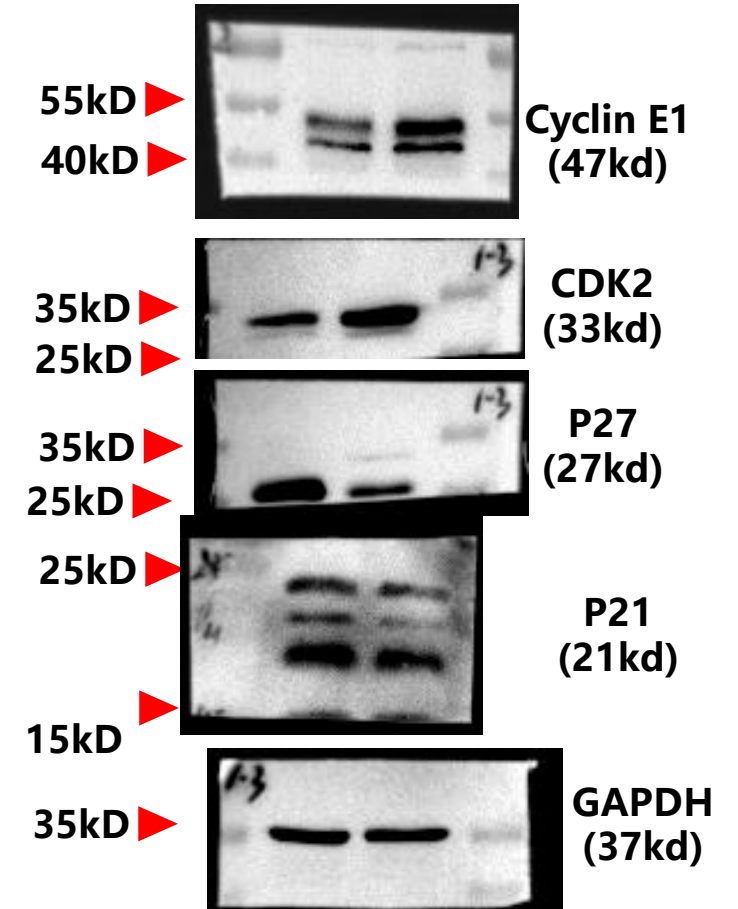

# Replication 1

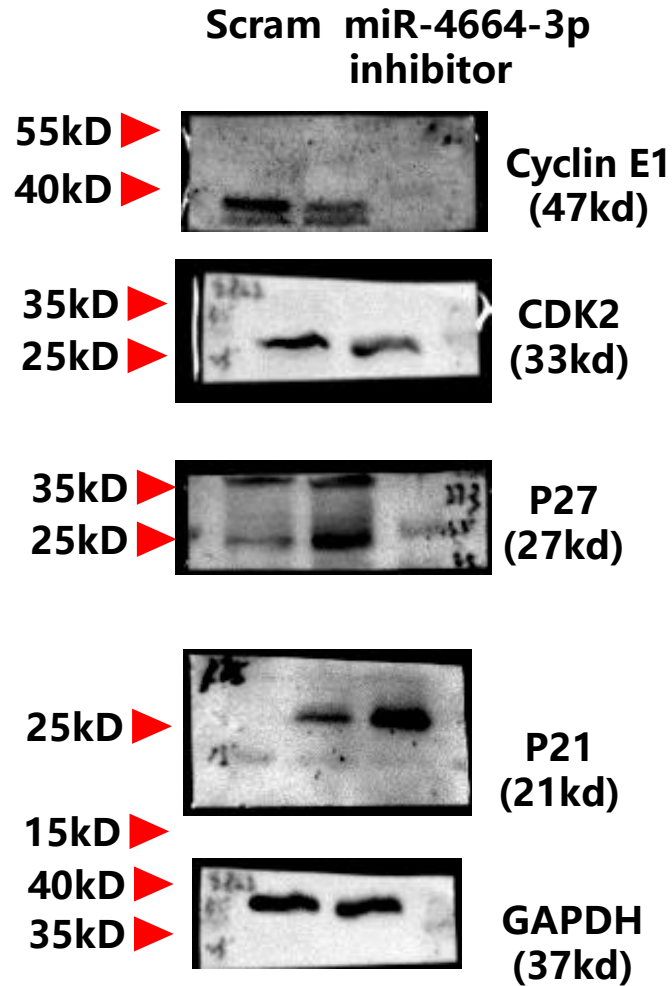

# Replication 2

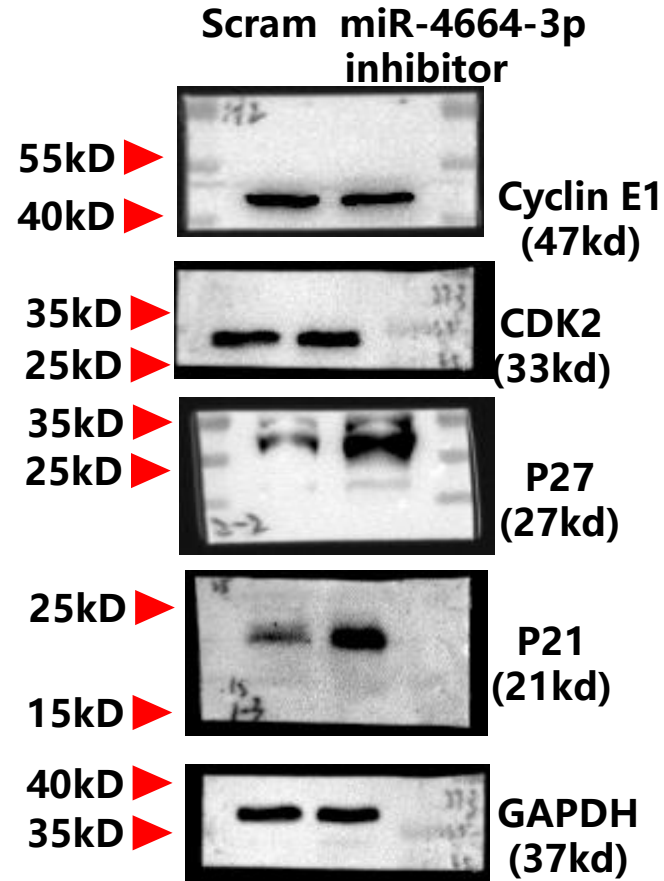

# Replication 3

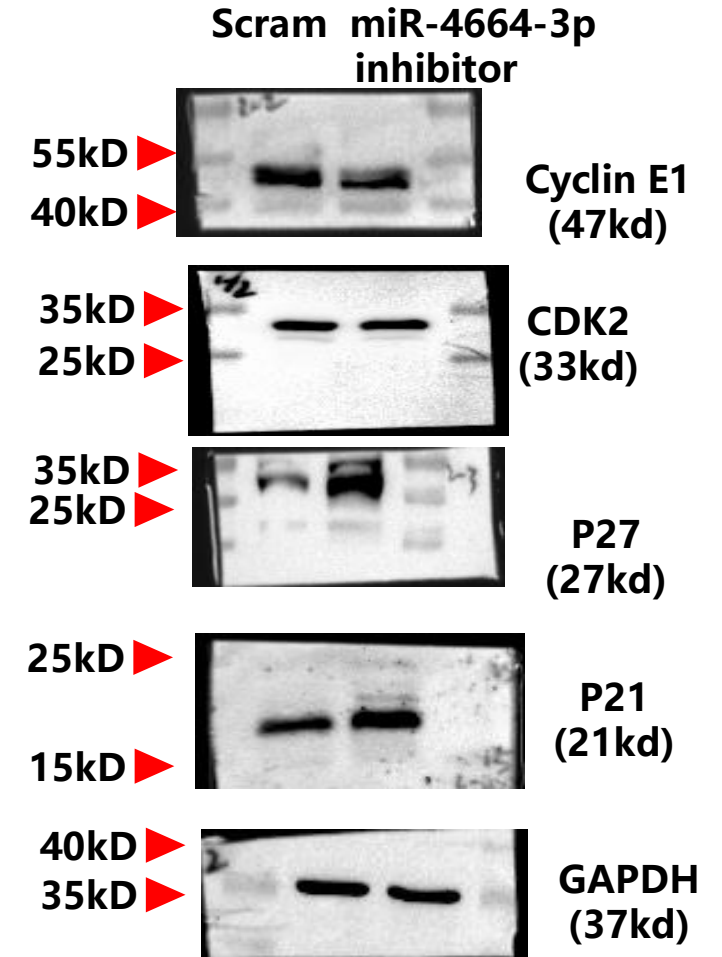

# Replication 1

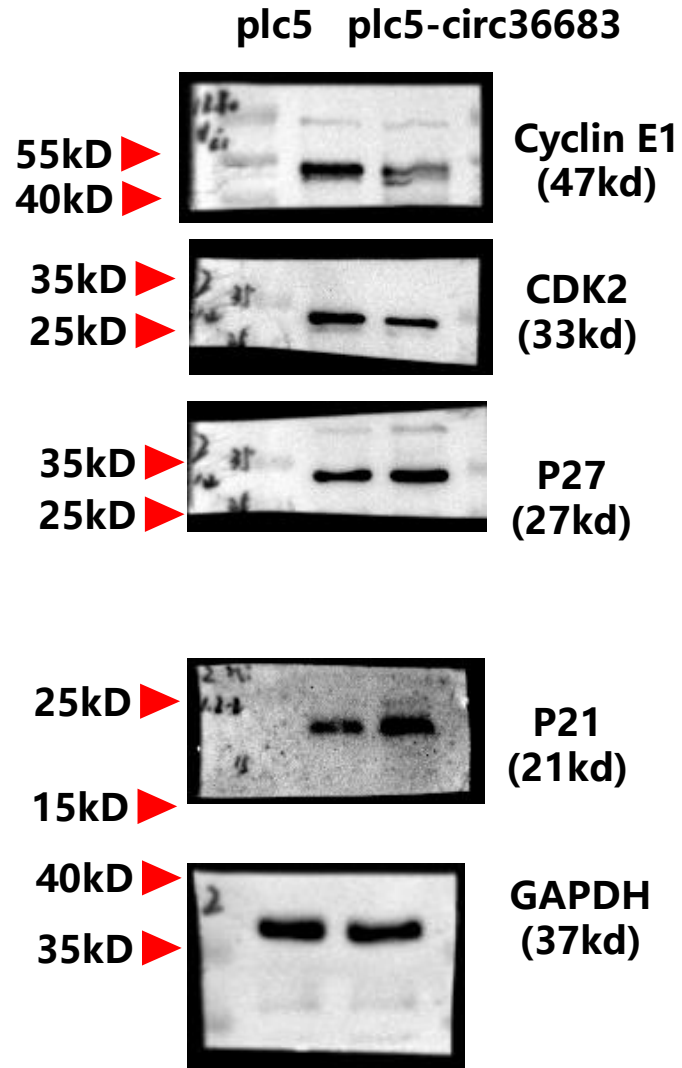

# Replication 2

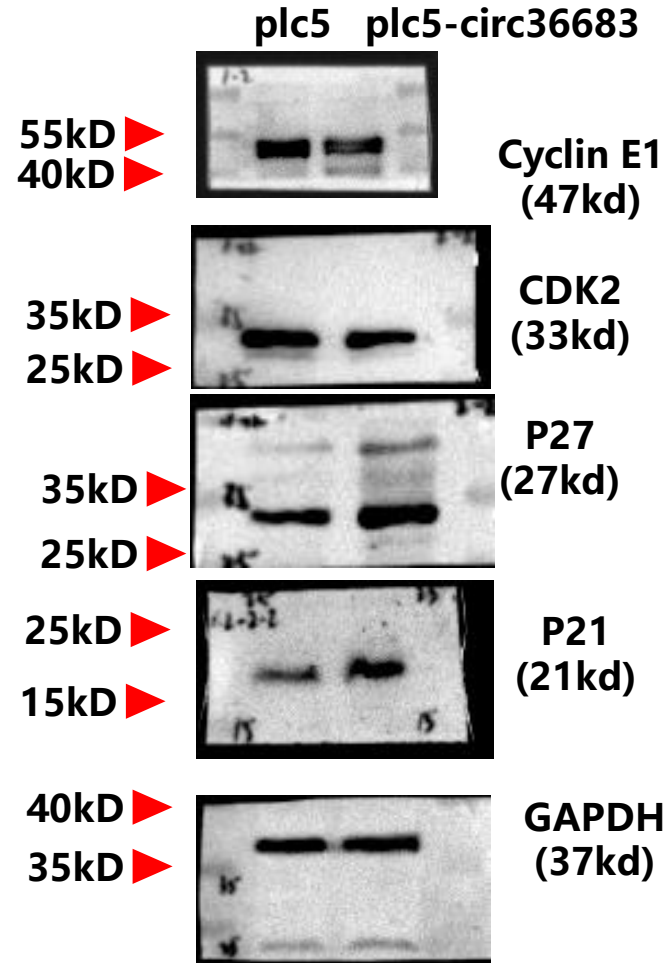

# Replication 3

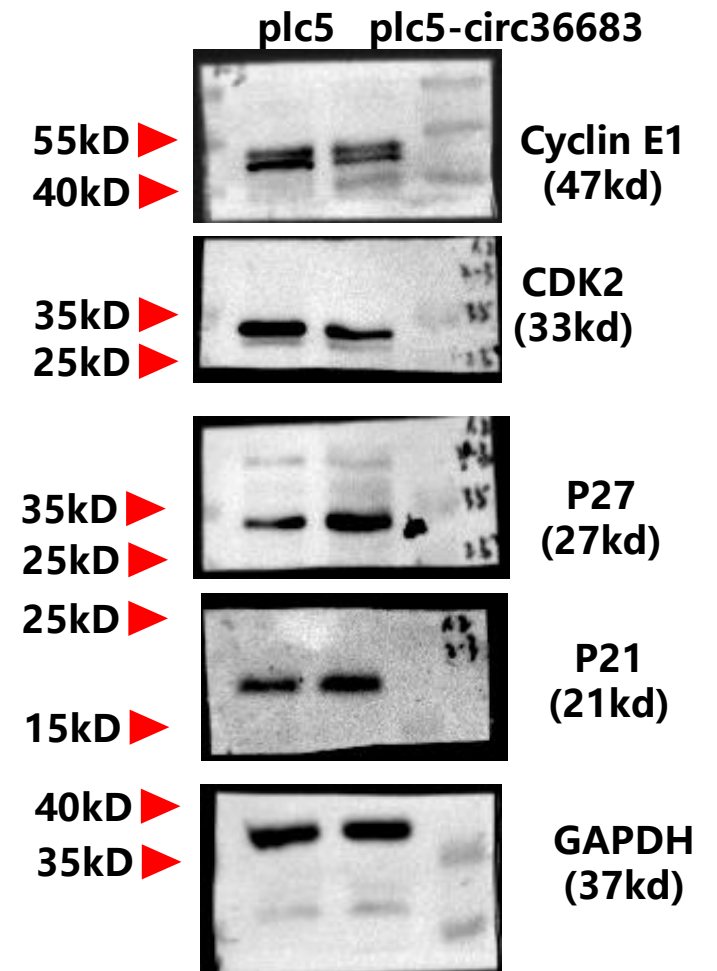

# Replication 1

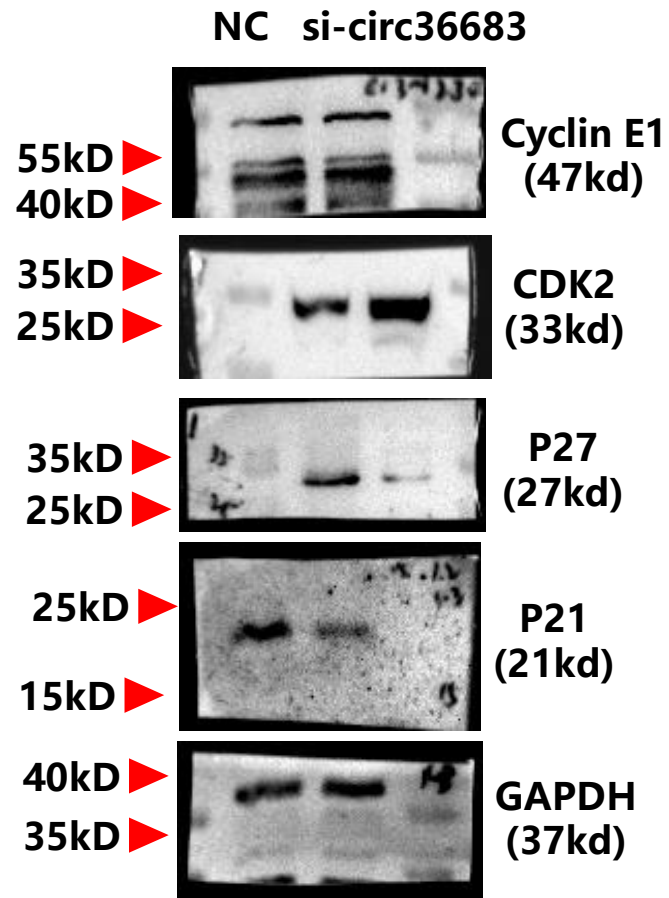

# Replication 2

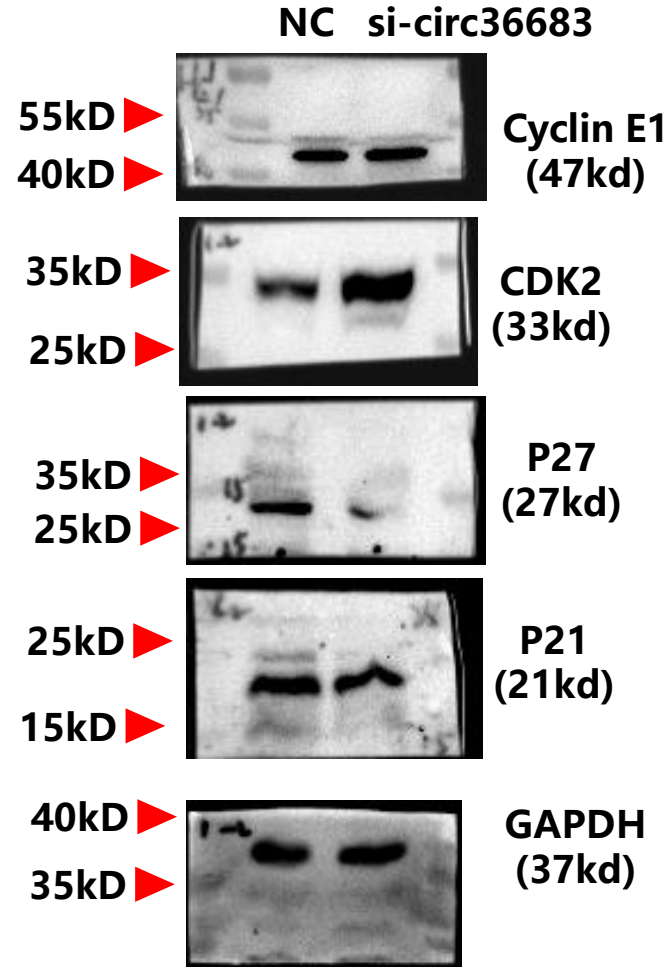

# Replication 3

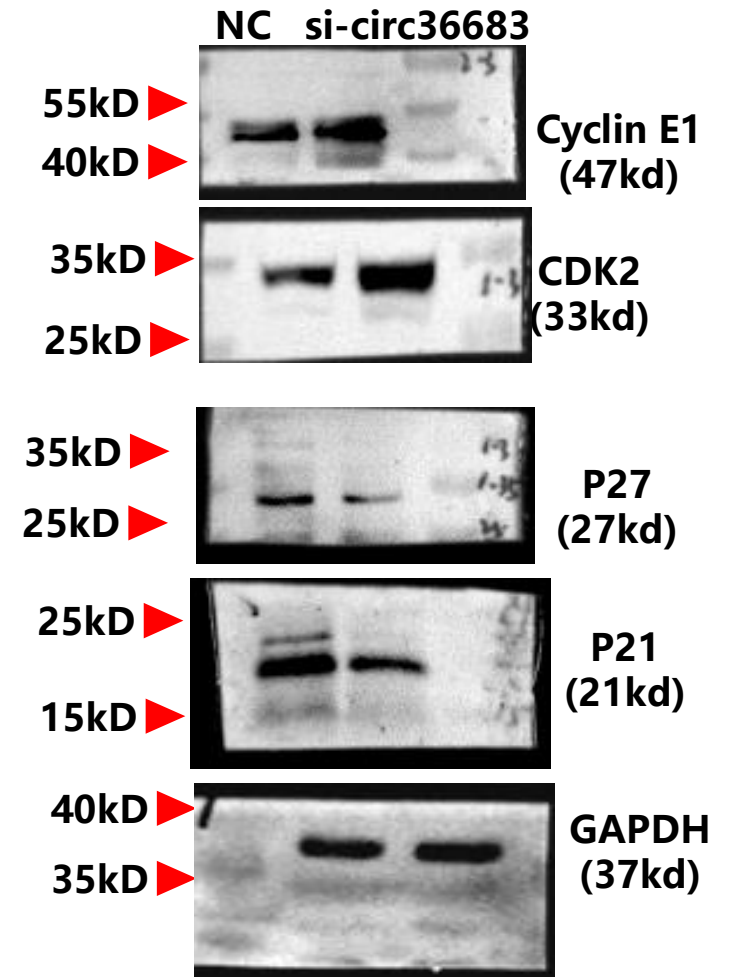

# Expression of markers of proliferation and migration in A549

## Replication 1

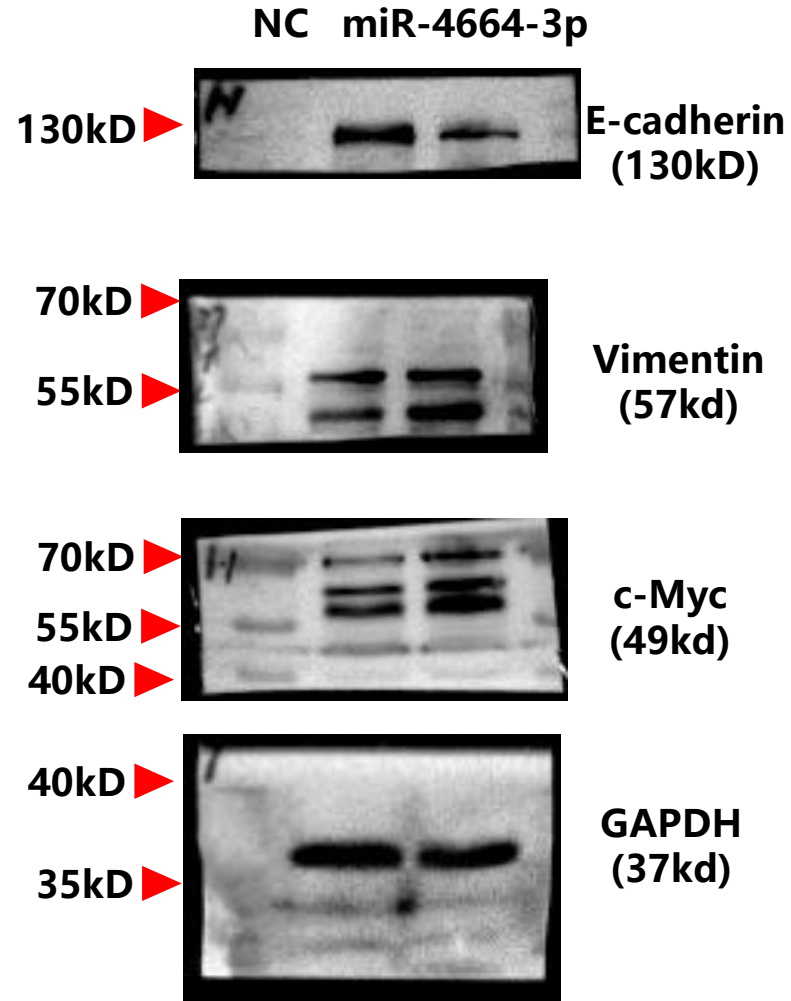

## Replication 2

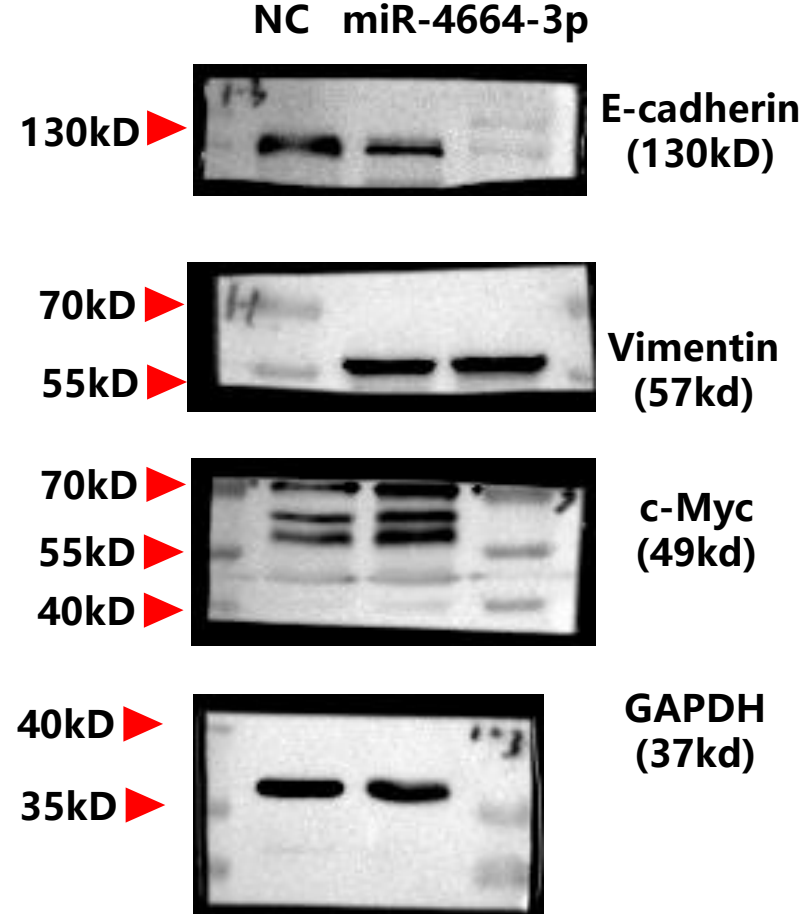

## Replication 3

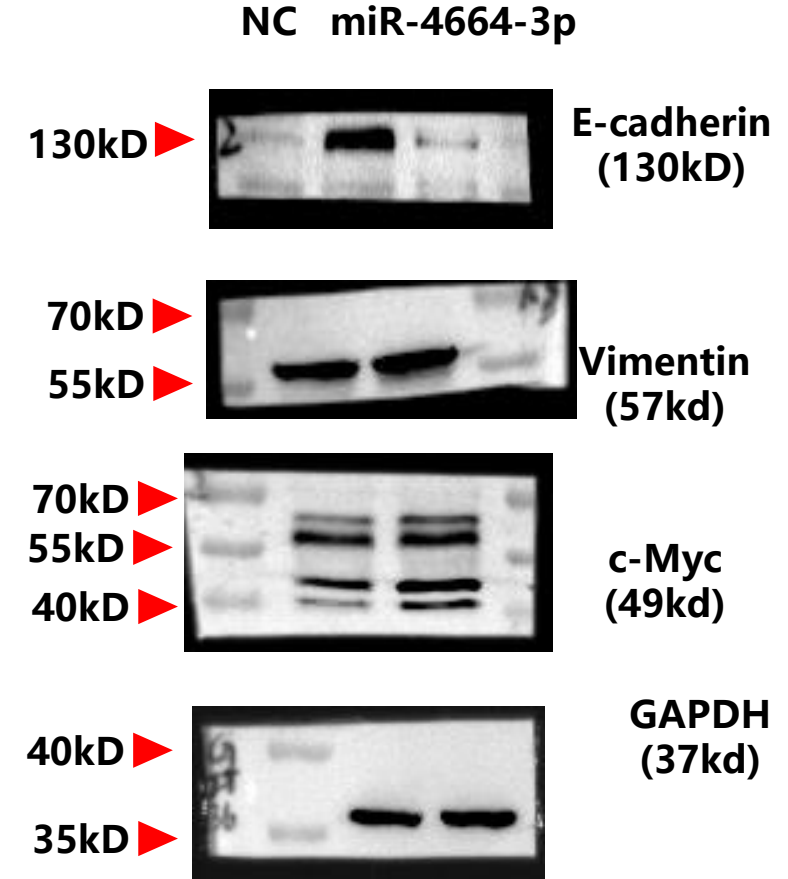

# Replication 1

Scram miR-4664-3p inhibitor

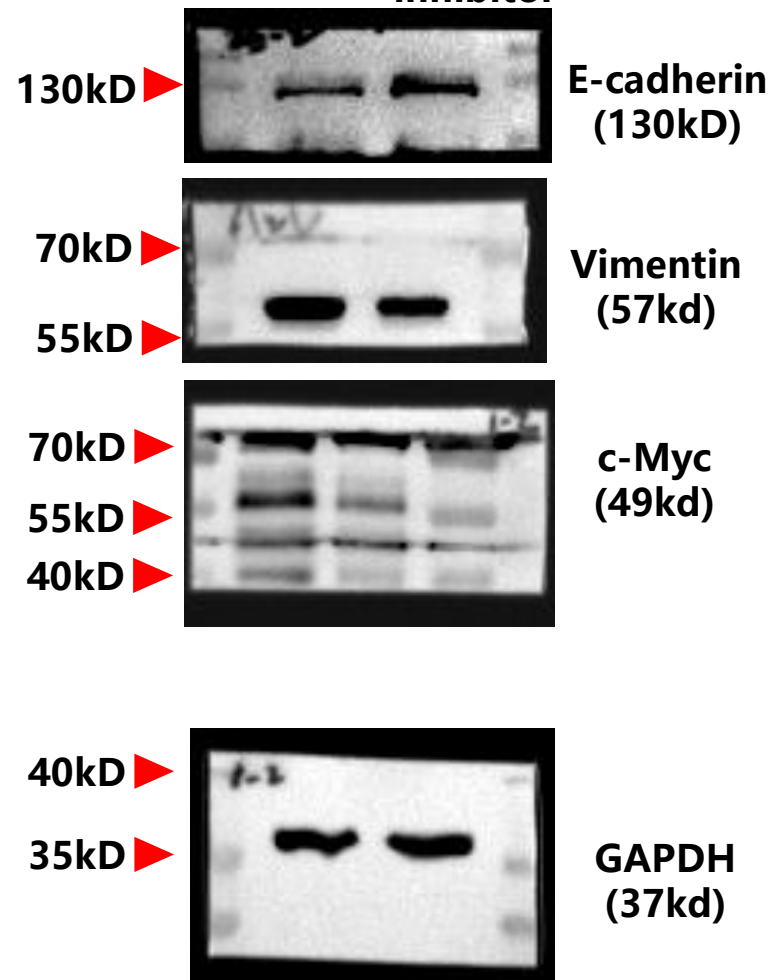

# Replication 2

Scram miR-4664-3p inhibitor

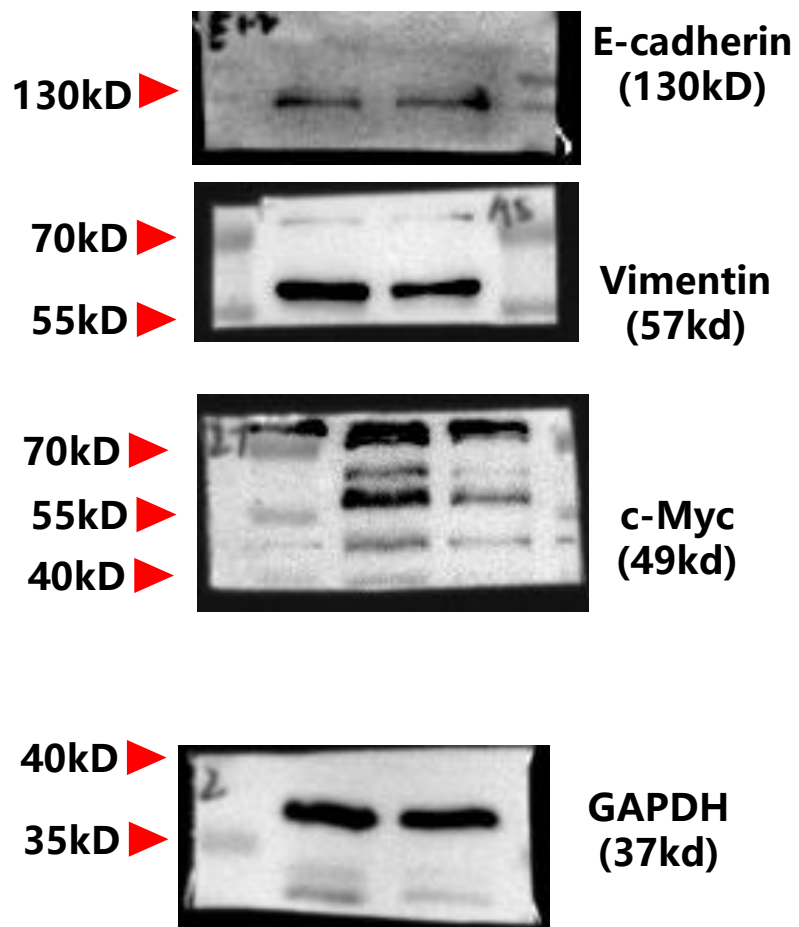

# Replication 3

Scram miR-4664-3p inhibitor

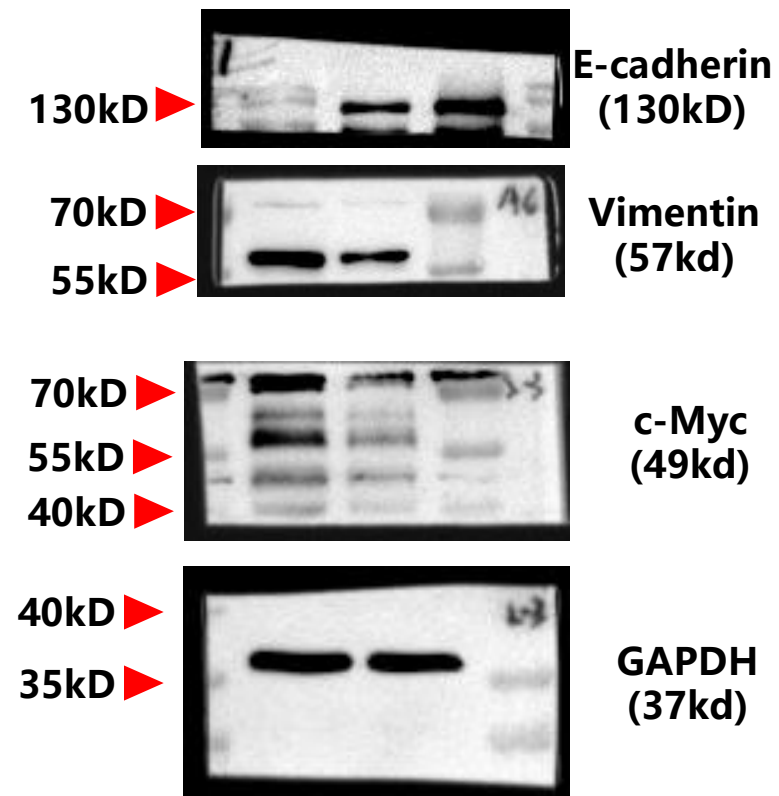

# Replication 1

plc5 plc5-circ36683

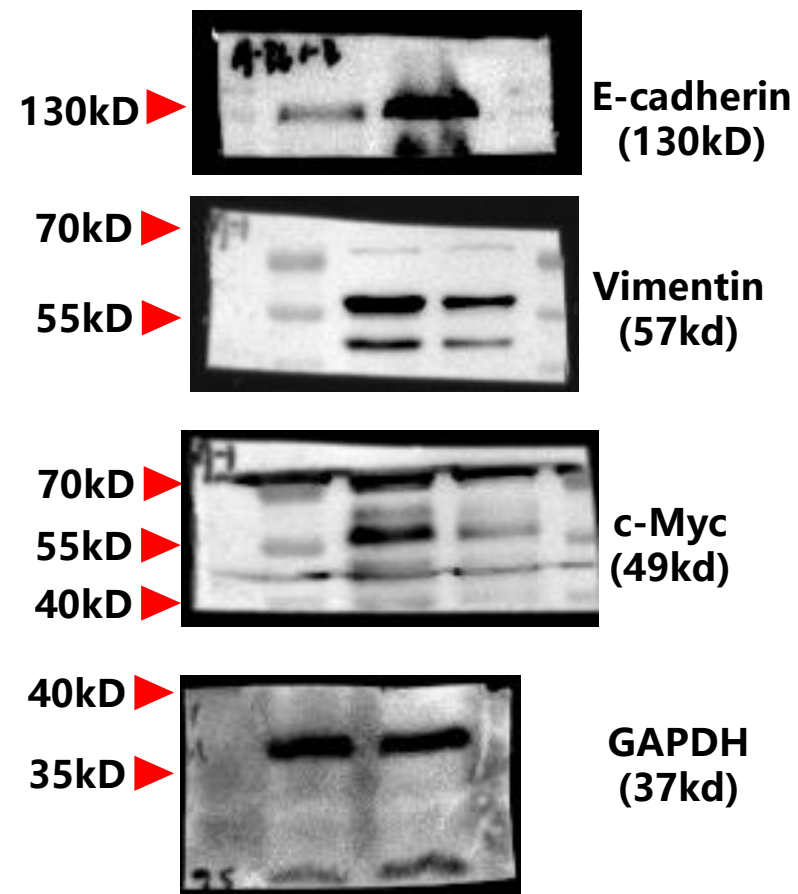

# Replication 2

plc5 plc5-circ36683

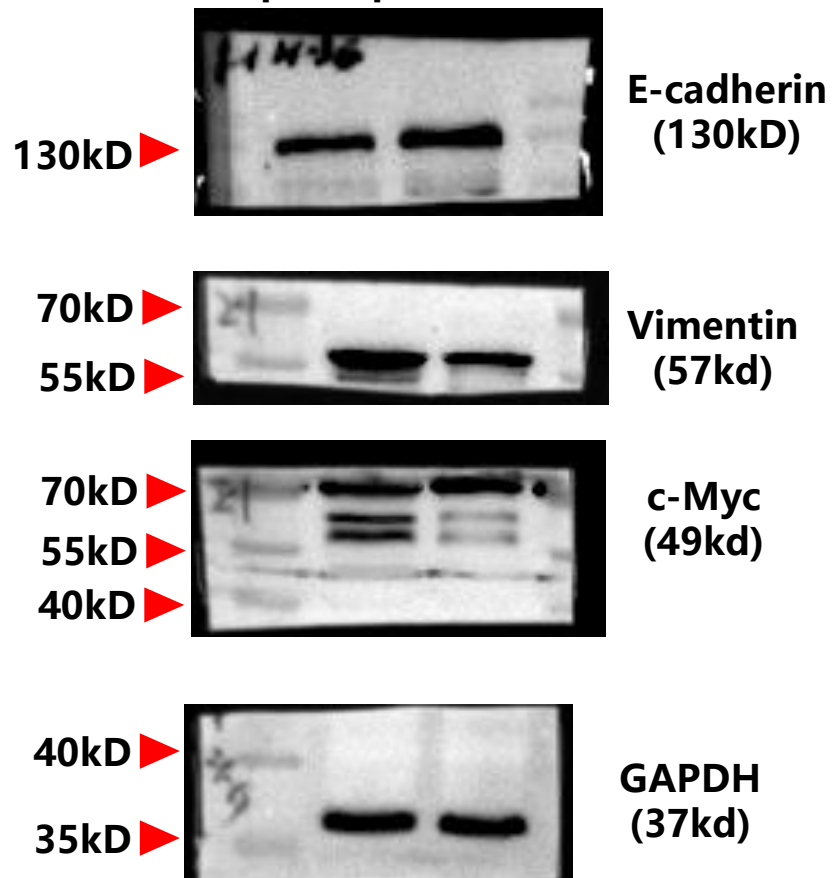

# Replication 3

plc5 plc5-circ36683

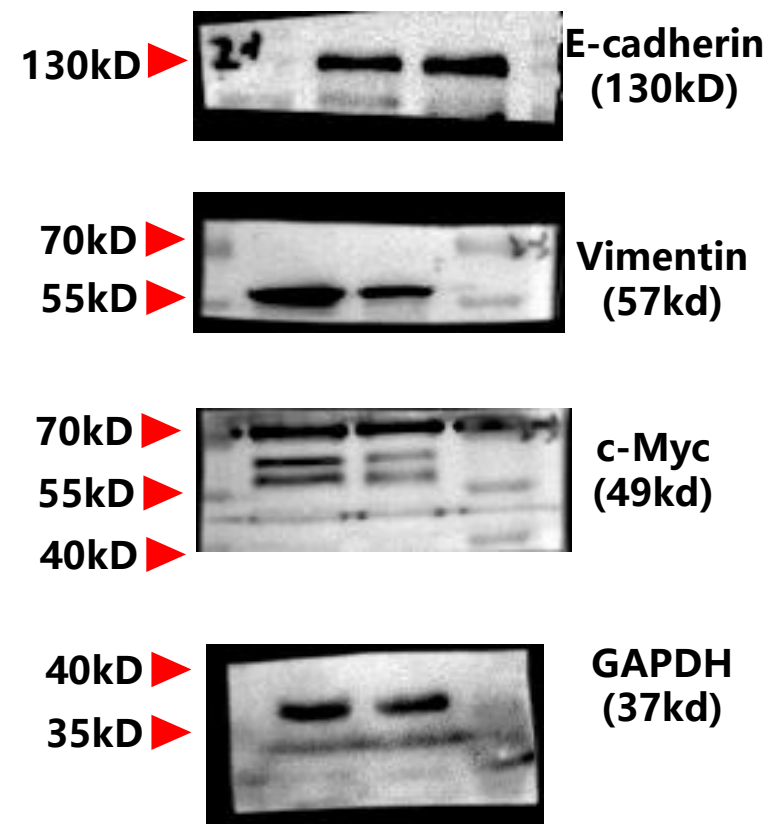

## Replication 1

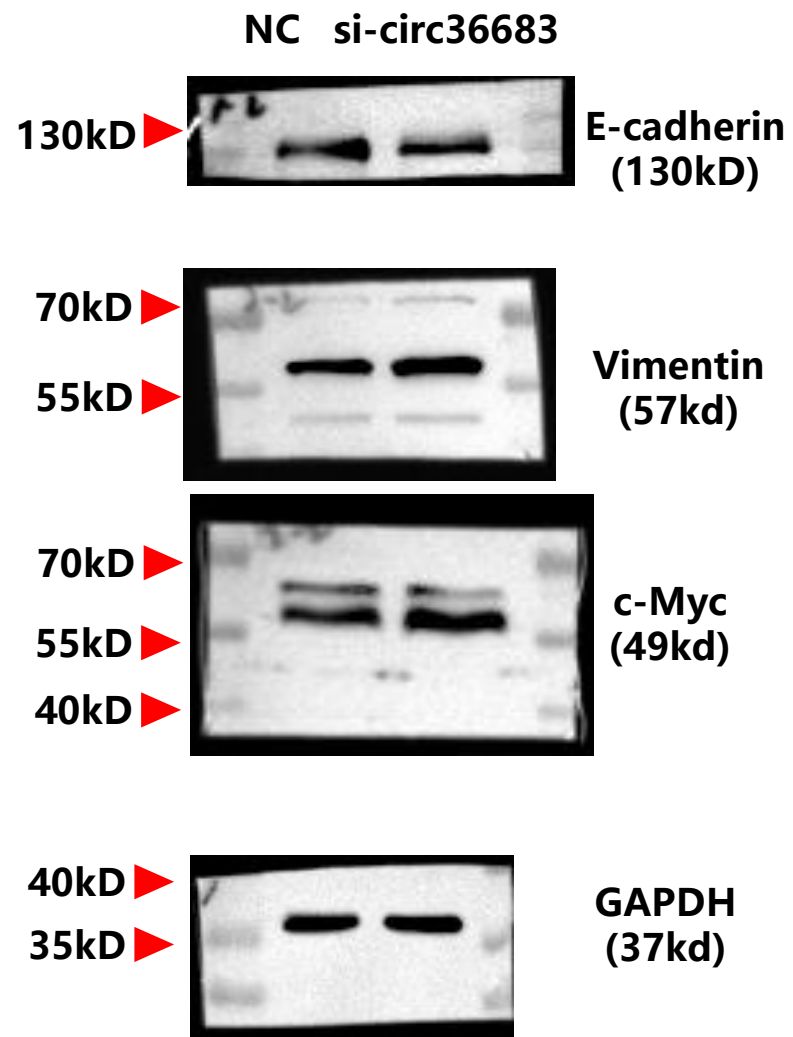

## Replication 2

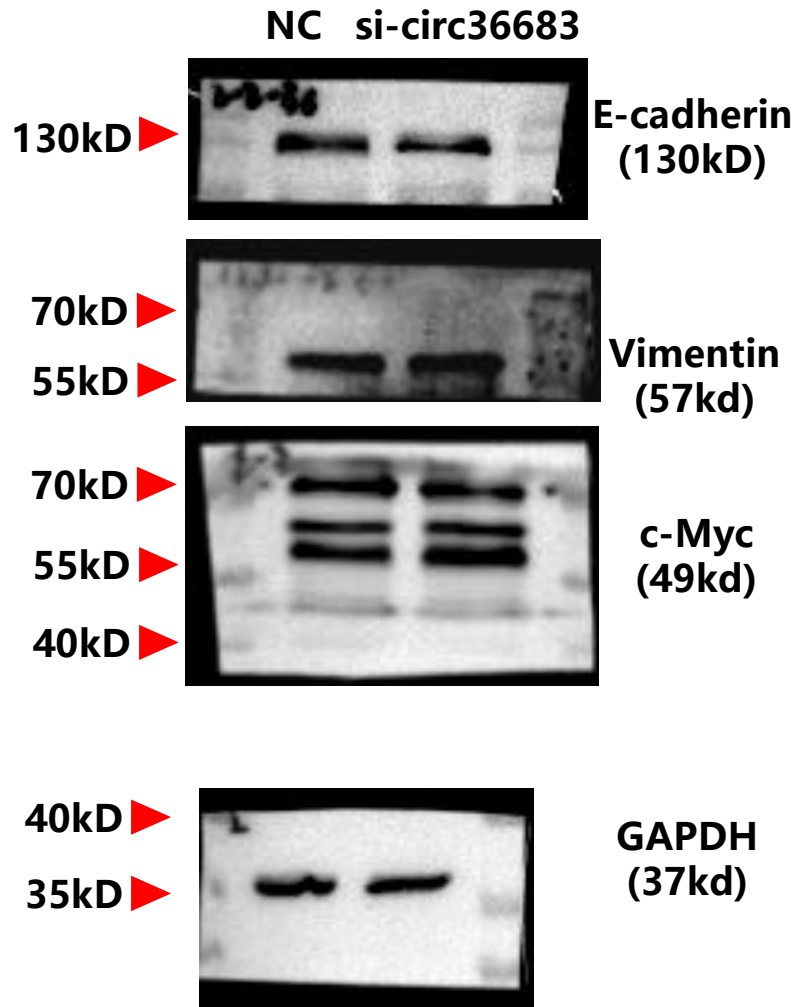

## Replication 3

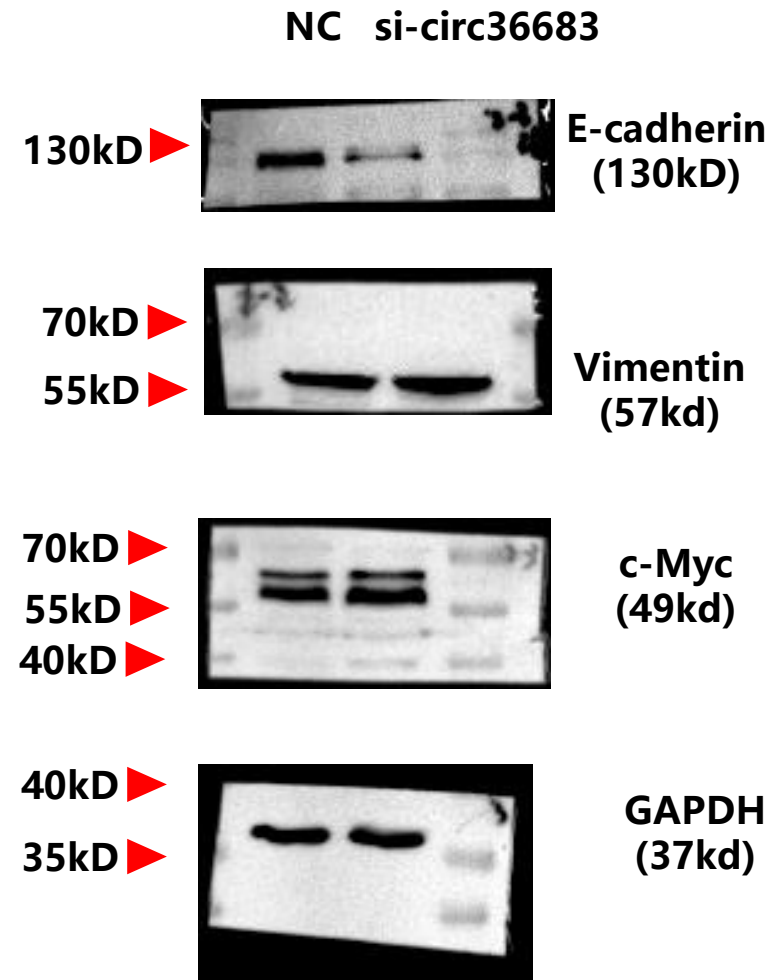



# Expression of markers of proliferation and migration in H1975

## Replication 1

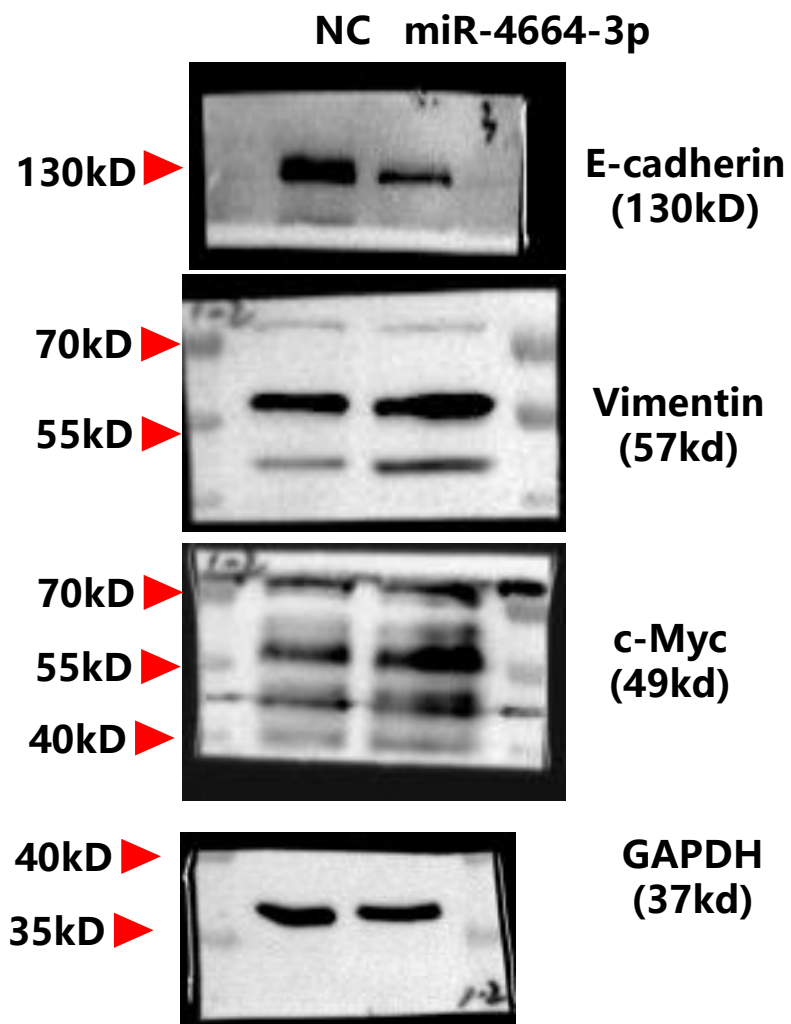

## Replication 2

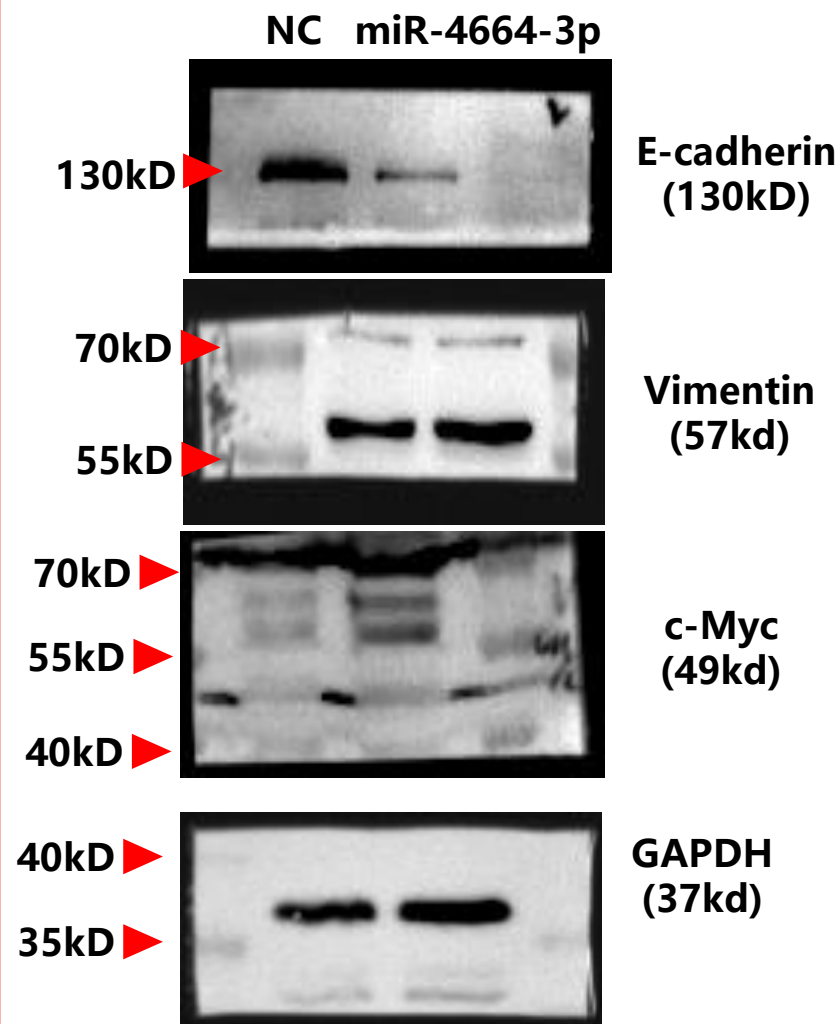

## Replication 3

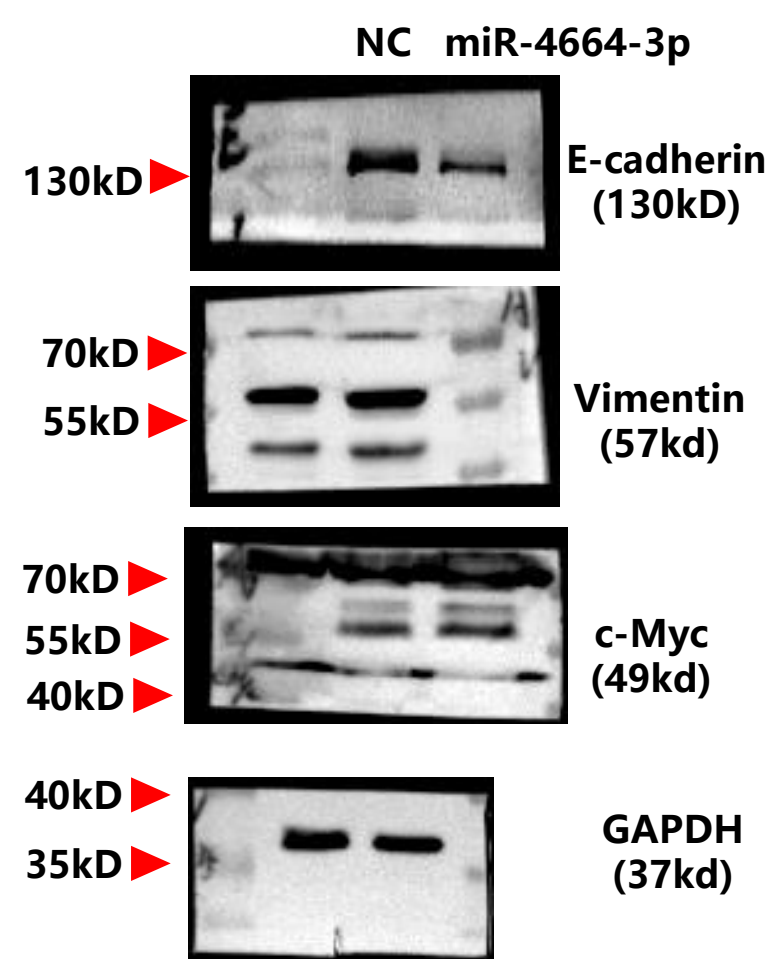

## Replication 1

Scram miR-4664-3p  
inhibitor

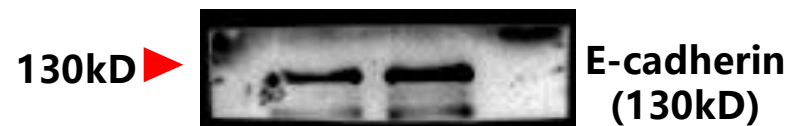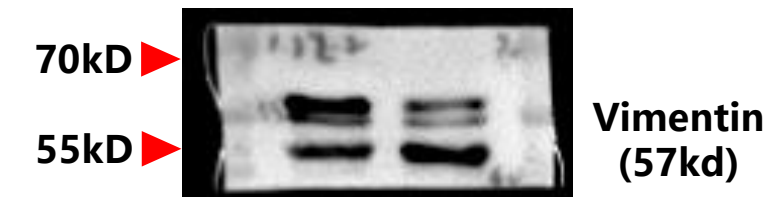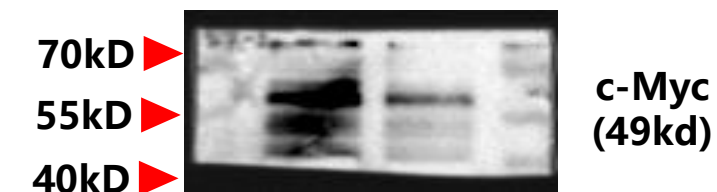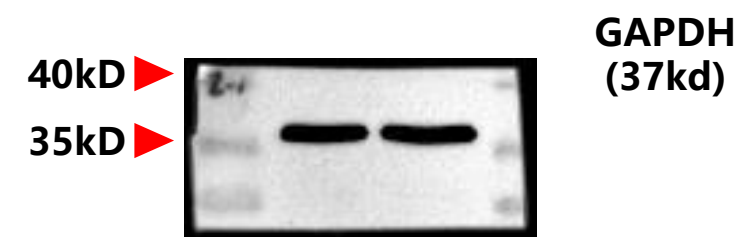

## Replication 2

Scram miR-4664-3p  
inhibitor

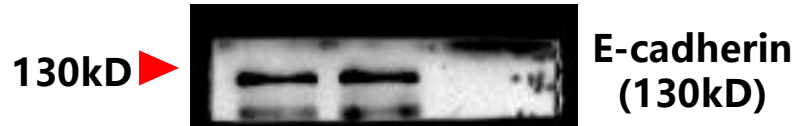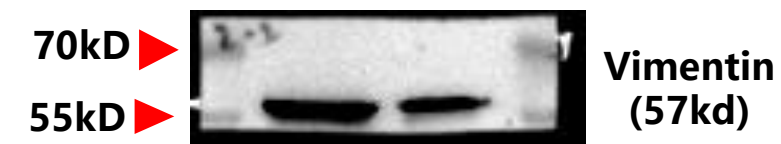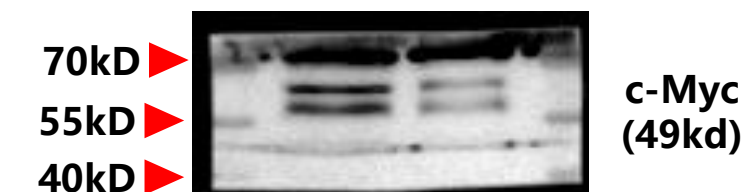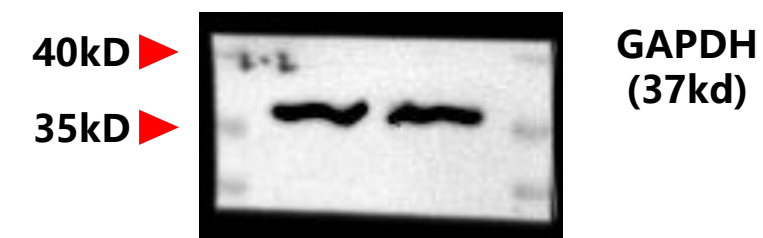

## Replication 3

Scram miR-4664-3p  
inhibitor

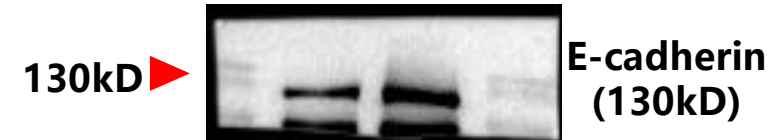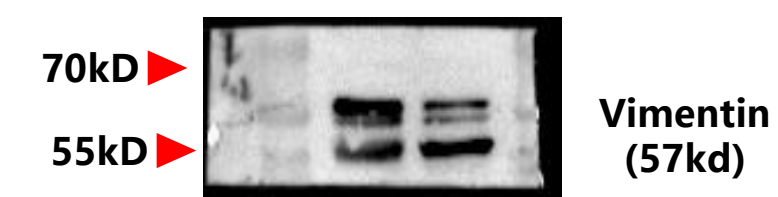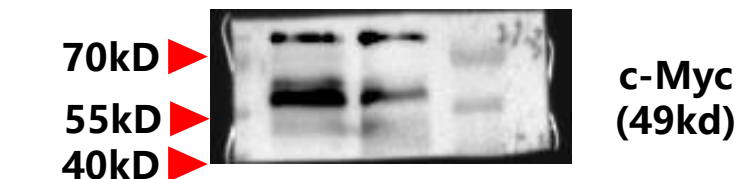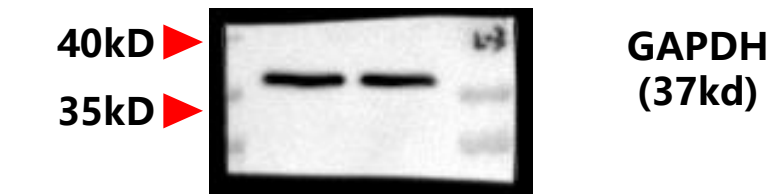

# Expression of p53 in A549

## Replication 1

NC miR-4664-3p

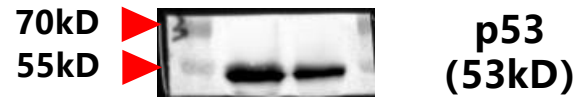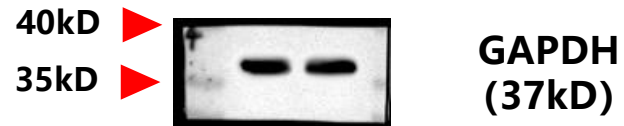

## Replication 2

NC miR-4664-3p

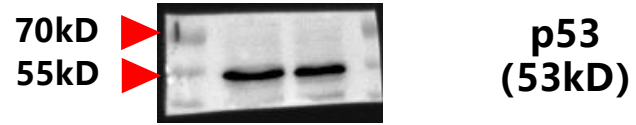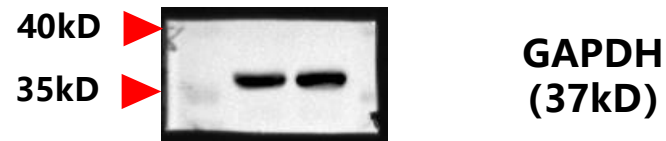

## Replication 3

NC miR-4664-3p

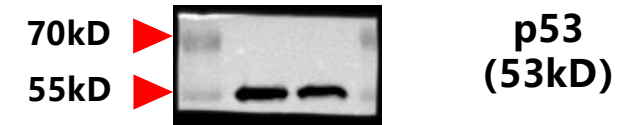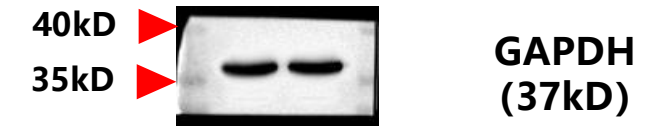

Scram miR-4664-3p  
inhibitor

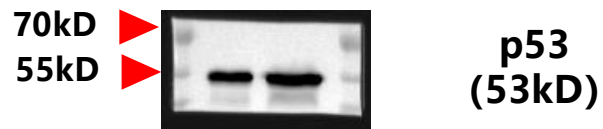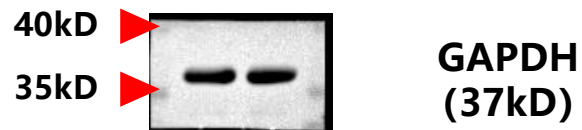

Scram miR-4664-3p  
inhibitor

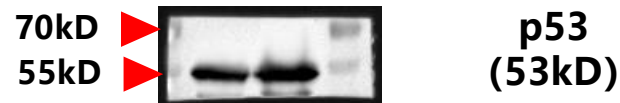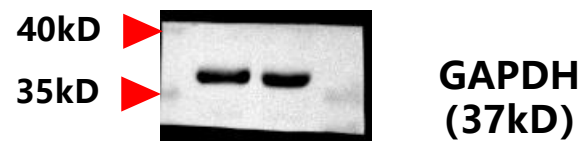

Scram miR-4664-3p  
inhibitor

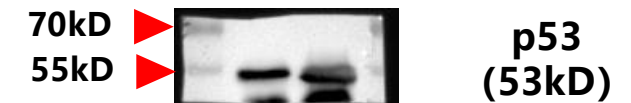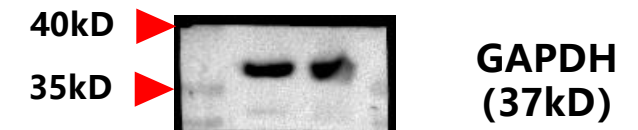

# Replication 1

plc5 plc5-circ36683

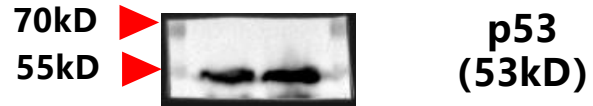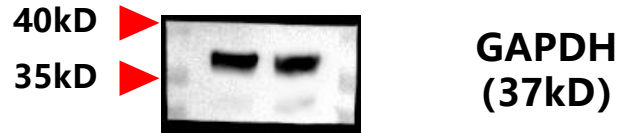

NC si-circ36683

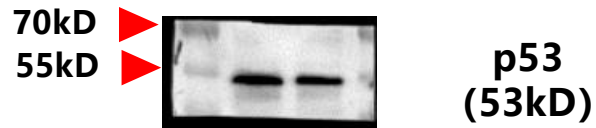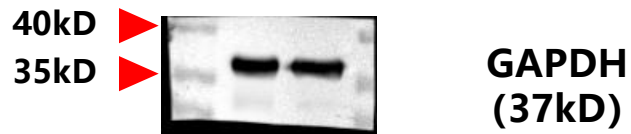

# Replication 2

plc5 plc5-circ36683

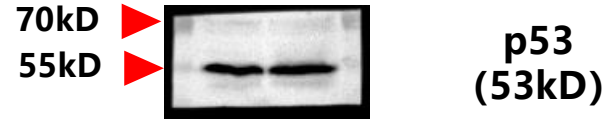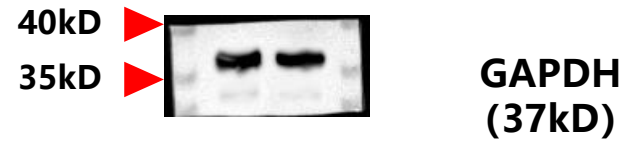

NC si-circ36683

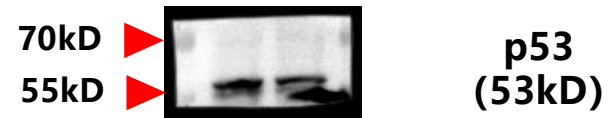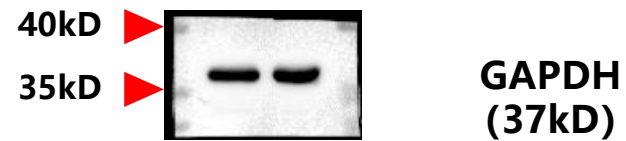

# Replication 3

plc5 plc5-circ36683

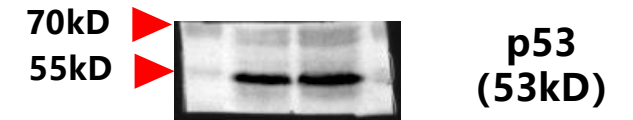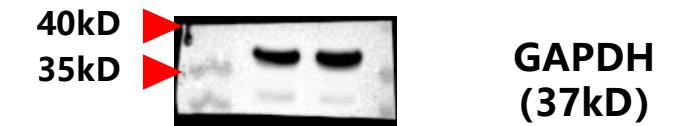

NC si-circ36683

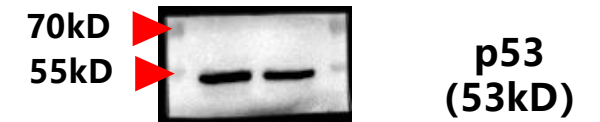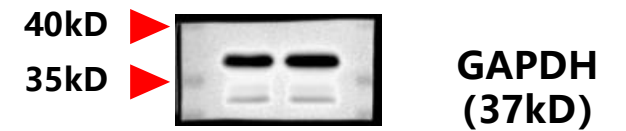

# Expression of p53 in xenograft

## Replication 1

NC miR-4664-3p

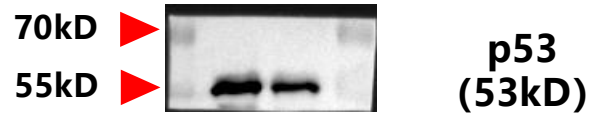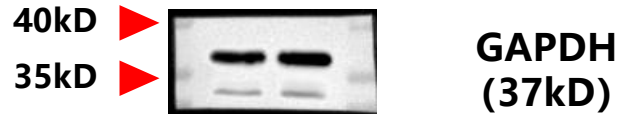

Scram miR-4664-3p  
inhibitor

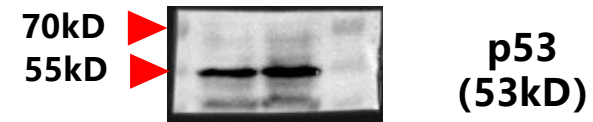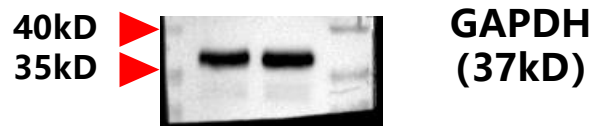

## Replication 2

NC miR-4664-3p

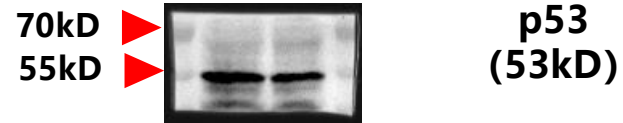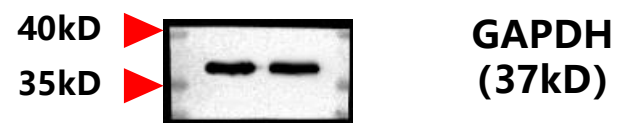

Scram miR-4664-3p  
inhibitor

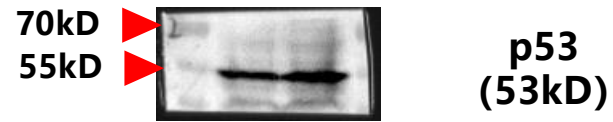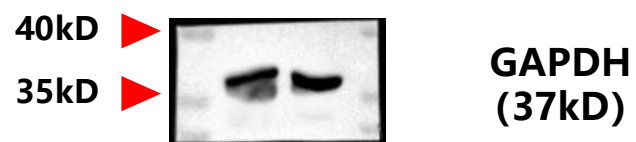

## Replication 3

NC miR-4664-3p

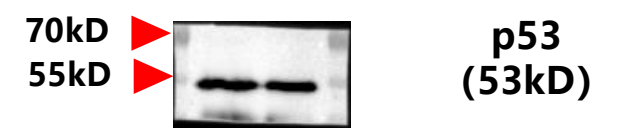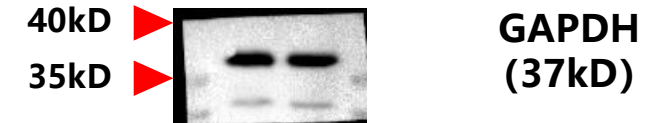

Scram miR-4664-3p  
inhibitor

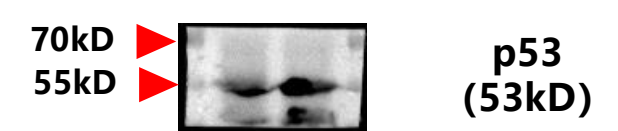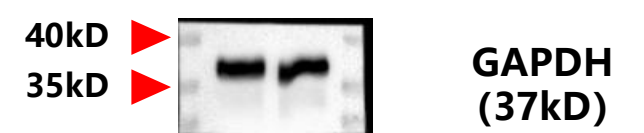

Supplement: TCA-15-1929-s004.pdf [file TCA-15-1929-s004.pdf]
