# Supplementary material for: Novel circular RNA hsa_circ_0036683 suppresses proliferation and migration by mediating the miR‐4664‐3p/CDK2AP2 axis in non‐small cell lung cancer
Source: PubMed Central journal article supplement — Thorac Cancer. 2024 Aug 7;15(27):1929–45. doi: 10.1111/1759-7714.15396 (PMC11462936; doi:10.1111/1759-7714.15396), 2024-08-07

# Sample of Patient 1

---

## PA Replication

---

## CA Replication

---

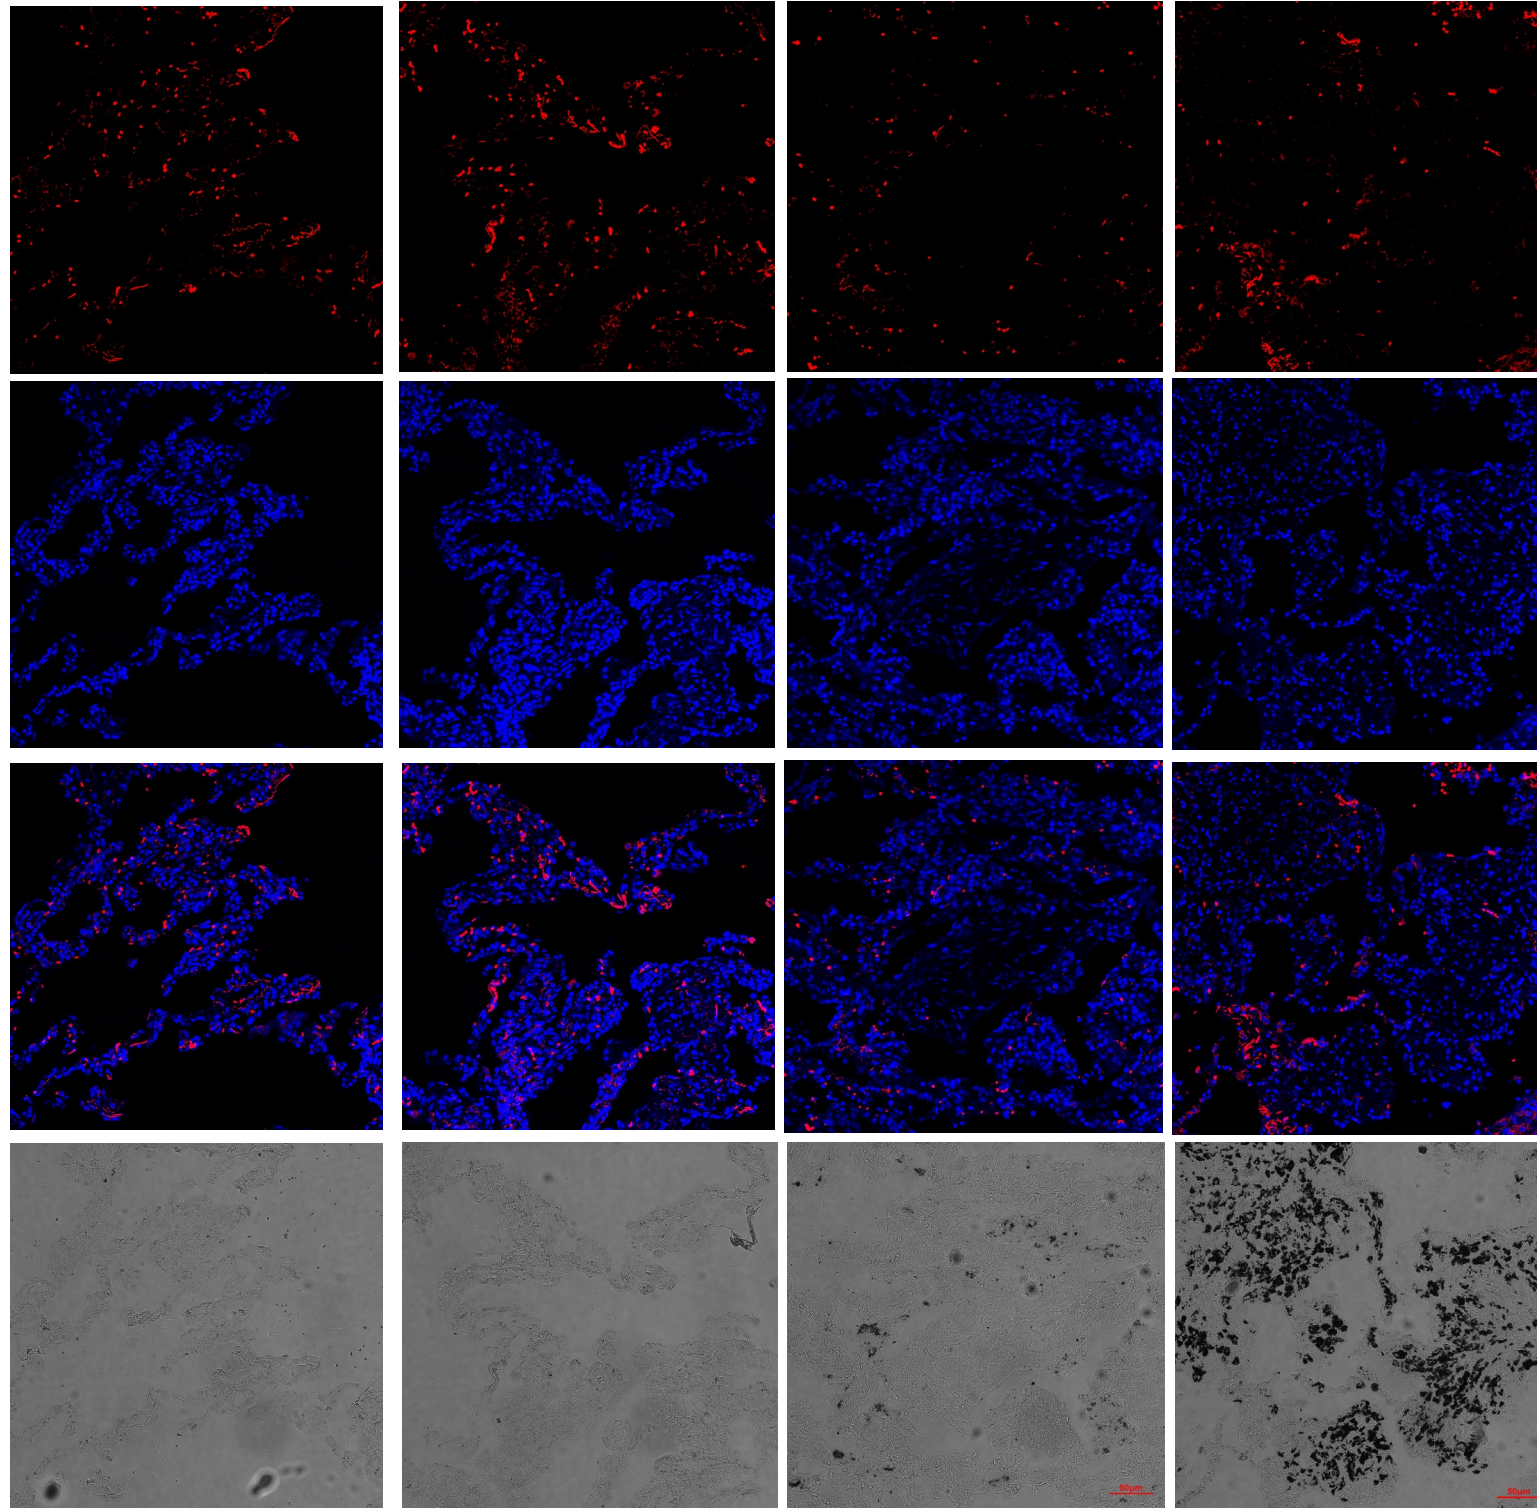

# Sample of Patient 2

---

## PA Replication

---

## CA Replication

---

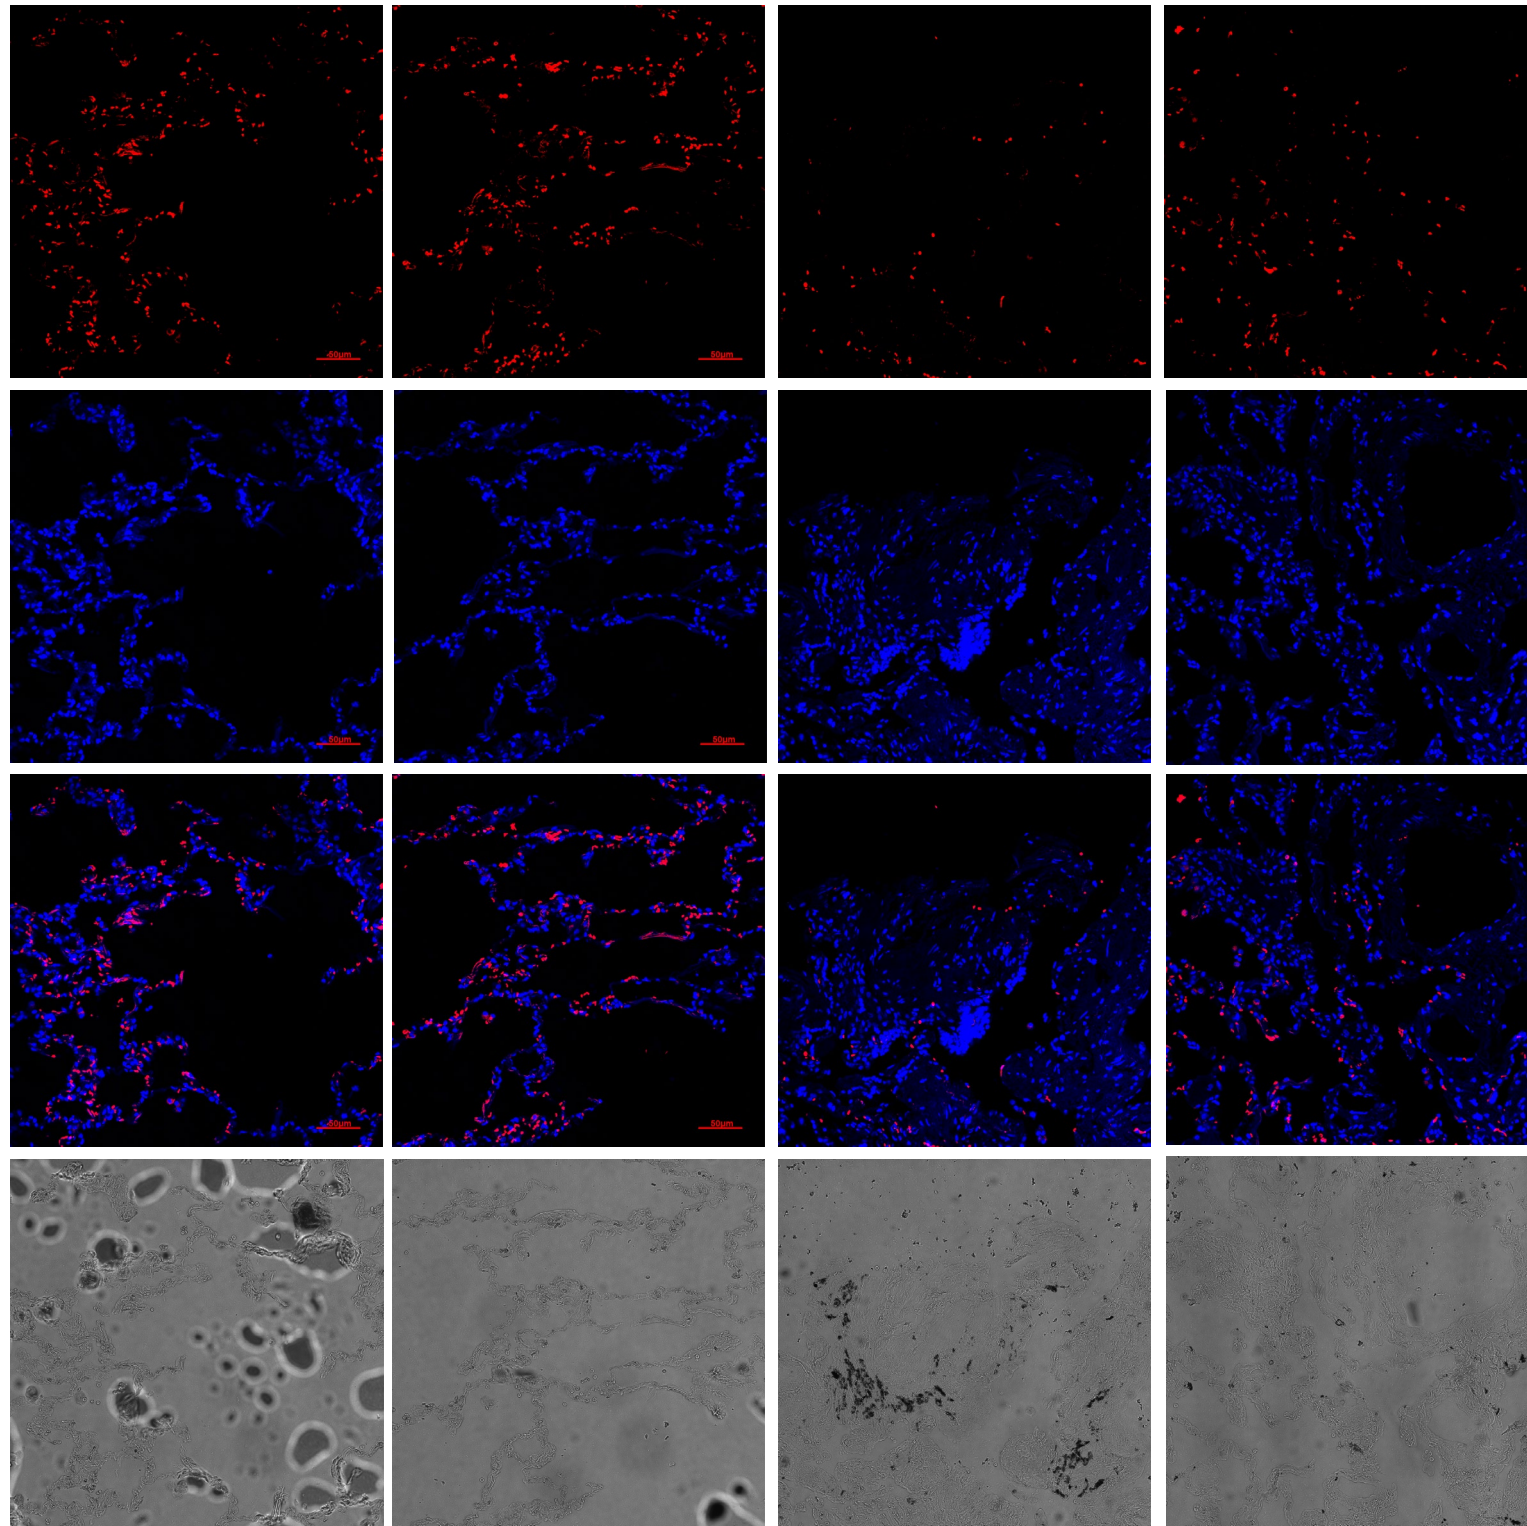

# Sample of Patient 3

---

## PA Replication

---

## CA Replication

---

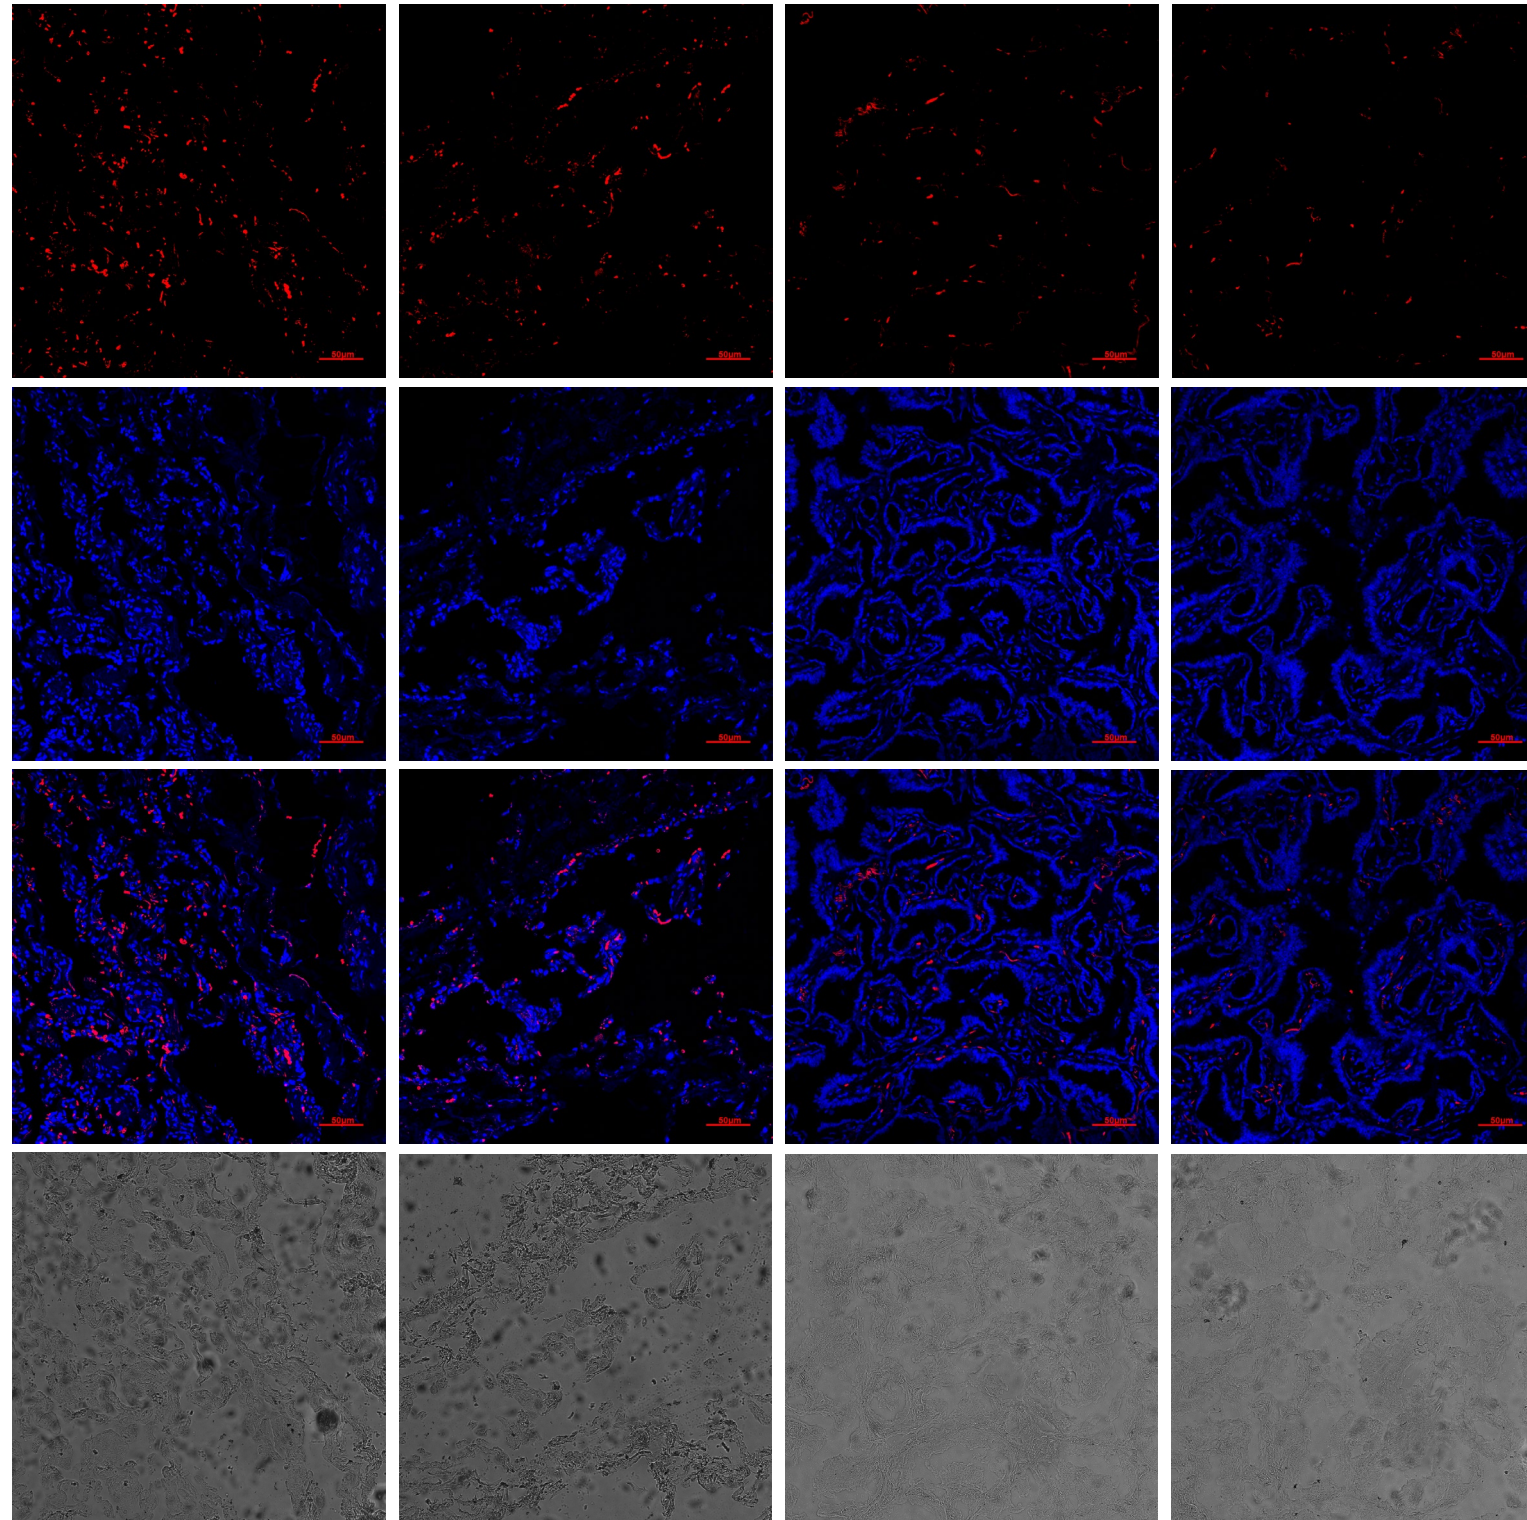

Supplement: TCA-15-1929-s001.pdf [file TCA-15-1929-s001.pdf]
